# Supplementary material for: Risk attitudes and human mobility during the COVID-19 pandemic
Source: PubMed Central journal article supplement (PMC7669857; doi:10.1038/s41598-020-76763-2), 2020-11-16
Supplement: 41598_2020_76763_MOESM1_ESM.pdf [file 41598_2020_76763_MOESM1_ESM.pdf]

**Supplementary Information for:**  
**Risk Attitudes and Human Mobility during the COVID-19 Pandemic**

Ho Fai Chan<sup>1,2\*</sup>, Ahmed Skali<sup>3</sup>, David A. Savage<sup>2,4</sup>, David Stadelmann<sup>2,5,6,7</sup>, Benno Torgler<sup>1,2,7</sup>

<sup>1</sup>School of Economics and Finance, Queensland University of Technology, Australia

<sup>2</sup>Centre for Behavioral Economics, Society and Technology (BEST), Australia

<sup>3</sup>Department of Economics, Deakin University, Australia

<sup>4</sup>Newcastle Business School, University of Newcastle, Australia

<sup>5</sup>University of Bayreuth, Germany

<sup>6</sup>IREF – Institute for Research in Economic and Fiscal Issues

<sup>7</sup>CREMA—Center for Research in Economics, Management, and the Arts, Switzerland

\*e-mail: [hofai.chan@qut.edu.au](mailto:hofai.chan@qut.edu.au)

## Supplementary Results

### Robustness Checks.

This section presents the checks for robustness of our results, which are shown in Table S7 to S11 for the six sets of regressions conducted in the main text, respectively. The first two checks concern including regions with censored mobility value in the sample of the analysis. We impose two restrictions on sample inclusion 1) regions with at least one censored value for the outcome mobility measures are excluded from the corresponding regression and 2) a more restrictive criteria with regions at least one censored value for any of the outcome mobility measures are excluded from the analysis. The first criteria excluded number of regions ranging from 54 (Workplace) to 217 (Residential), depending on the outcome mobility measure used while the second criteria reduce the number of regions to 484. The third check concerns if estimates are sensitive to whether government response is general by recoding indicators as no measures taken if the movement restrictions (or recommendation of restrictions) were not applied countrywide. In general, our main findings are robust to all three checks.

For the overall risk-mobility relationship (comparing estimates from Table S7 to Table S1), imposing sample exclusions increases the strength of the relationship for all mobility measures except for transit station under the first exclusion rule (first exclusion rule: retail & recreation:  $\beta=2.219$ , s.e.=1.183,  $CI_{95\%}=[-0.099;4.537]$ ,  $P=0.061$ ; grocery & pharmacy:  $\beta=-0.325$ , s.e.=1.006,  $CI_{95\%}=[-2.298;1.647]$ ,  $P=0.746$ ; parks:  $\beta=8.019$ , s.e.=2.535,  $CI_{95\%}=[3.050;12.987]$ ,  $P=0.002$ ; transit stations:  $\beta=1.306$ , s.e.=1.352,  $CI_{95\%}=[-1.344;3.956]$ ,  $P=0.334$ ; workplaces:  $\beta=0.761$ , s.e.=0.854,  $CI_{95\%}=[-0.913;2.434]$ ,  $P=0.373$ ; residential:  $\beta=0.089$ , s.e.=0.413,  $CI_{95\%}=[-0.721;0.900]$ ,  $P=0.829$ ; second exclusion rule: retail & recreation:  $\beta=2.551$ , s.e.=1.074,  $CI_{95\%}=[0.447;4.656]$ ,  $P=0.017$ ; grocery & pharmacy:  $\beta=-0.279$ , s.e.=0.905,  $CI_{95\%}=[-2.052;1.494]$ ,  $P=0.758$ ; parks:  $\beta=9.463$ , s.e.=2.589,  $CI_{95\%}=[4.388;14.539]$ ,  $P<0.001$ ; transit stations:  $\beta=1.865$ , s.e.=1.186,  $CI_{95\%}=[-0.459;4.189]$ ,  $P=0.116$ ; workplaces:  $\beta=-0.246$ , s.e.=0.773,  $CI_{95\%}=[-1.761;1.269]$ ,  $P=0.751$ ; residential:  $\beta=0.251$ , s.e.=0.427,  $CI_{95\%}=[-0.587;1.088]$ ,  $P=0.557$ ). Transforming the government response indicators slight reduce the size of the coefficients while leaving the statistical significance unchanged (retail & recreation:  $\beta=3.724$ , s.e.=1.225,  $CI_{95\%}=[1.324;6.124]$ ,  $P=0.002$ ; grocery & pharmacy:  $\beta=-0.247$ , s.e.=1.138,  $CI_{95\%}=[-2.477;1.984]$ ,  $P=0.828$ ; parks:  $\beta=6.070$ ,

s.e.=2.455, CI<sub>95%</sub>=[1.258;10.882],  $P=0.013$ ; transit stations:  $\beta=1.597$ , s.e.=1.597, CI<sub>95%</sub>=[-1.534;4.727],  $P=0.317$ ; workplaces:  $\beta=0.581$ , s.e.=0.940, CI<sub>95%</sub>=[-1.261;2.424],  $P=0.536$ ; residential:  $\beta=-0.481$ , s.e.=0.374, CI<sub>95%</sub>=[-1.213;0.252],  $P=0.199$ ). The coefficient estimates for our main control variables (*pandemic declaration* and *weekends*) are also close to those found in the main results, apart from % *population 65+*, where the negative effects on mobility change to non-residential places are more prominent in the restricted samples (checks 1 and 2).

For the declaration moderator effect on the risk-mobility relationship, the results (coefficients of the declaration x risk preference term) remain highly robust except for residential, where statistical significance is dropped when regions with censored values were removed (first exclusion rule: Retail & recreation:  $\beta=4.965$ , s.e.=1.210, CI<sub>95%</sub>=[2.593;7.337],  $P<0.001$ ; Grocery & pharmacy:  $\beta=6.265$ , s.e.=1.075, CI<sub>95%</sub>=[4.157;8.372],  $P<0.001$ ; Parks:  $\beta=10.471$ , s.e.=2.477, CI<sub>95%</sub>=[5.617;15.325],  $P<0.001$ ; Transit stations:  $\beta=6.919$ , s.e.=1.514, CI<sub>95%</sub>=[3.952;9.887],  $P<0.001$ ; Workplaces:  $\beta=3.768$ , s.e.=0.880, CI<sub>95%</sub>=[2.042;5.494],  $P<0.001$ ; Residential:  $\beta=-0.216$ , s.e.=0.515, CI<sub>95%</sub>=[-1.225;0.793],  $P=0.675$ ; second exclusion rule: Retail & recreation:  $\beta=4.702$ , s.e.=1.388, CI<sub>95%</sub>=[1.981;7.422],  $P<0.001$ ; Grocery & pharmacy:  $\beta=4.146$ , s.e.=1.190, CI<sub>95%</sub>=[1.815;6.478],  $P<0.001$ ; Parks:  $\beta=11.653$ , s.e.=2.695, CI<sub>95%</sub>=[6.372;16.935],  $P<0.001$ ; Transit stations:  $\beta=4.885$ , s.e.=1.698, CI<sub>95%</sub>=[1.556;8.213],  $P=0.004$ ; Workplaces:  $\beta=1.504$ , s.e.=0.995, CI<sub>95%</sub>=[-0.446;3.453],  $P=0.131$ ; Residential:  $\beta=-0.092$ , s.e.=0.548, CI<sub>95%</sub>=[-1.166;0.983],  $P=0.867$ ; government response indicators transformed: Retail & recreation:  $\beta=2.983$ , s.e.=1.083, CI<sub>95%</sub>=[0.860;5.107],  $P=0.006$ ; Grocery & pharmacy:  $\beta=2.926$ , s.e.=1.025, CI<sub>95%</sub>=[0.917;4.936],  $P=0.004$ ; Parks:  $\beta=7.071$ , s.e.=2.382, CI<sub>95%</sub>=[2.403;11.740],  $P=0.003$ ; Transit stations:  $\beta=2.934$ , s.e.=1.322, CI<sub>95%</sub>=[0.343;5.526],  $P=0.026$ ; Workplaces:  $\beta=0.284$ , s.e.=0.923, CI<sub>95%</sub>=[-1.524;2.092],  $P=0.758$ ; Residential:  $\beta=1.065$ , s.e.=0.443, CI<sub>95%</sub>=[0.197;1.934],  $P=0.016$ ).

For the weekend x risk-taking interaction term, the coefficients for retail and recreation remain statistically significant in all three checks (first exclusion rule:  $\beta=1.622$ , s.e.=0.308, CI<sub>95%</sub>=[1.018;2.225],  $P<0.001$ ; second exclusion rule:  $\beta=2.038$ , s.e.=0.349, CI<sub>95%</sub>=[1.354;2.722],  $P<0.001$ ; government response indicators transformed:  $\beta=1.464$ , s.e.=0.331, CI<sub>95%</sub>=[0.814;2.113],  $P<0.001$ ) as well as for parks (first exclusion rule:  $\beta=3.441$ , s.e.=1.092, CI<sub>95%</sub>=[1.301;5.581],  $P=0.002$ ; second exclusion rule:  $\beta=4.474$ , s.e.=1.306, CI<sub>95%</sub>=[1.914;7.035],  $P<0.001$ ; government response indicators transformed:  $\beta=1.997$ ,

s.e.=1.026,  $CI_{95\%}=[-0.015;4.009]$ ,  $P=0.052$ ), transit stations (first exclusion rule:  $\beta=1.251$ , s.e.=0.541,  $CI_{95\%}=[0.192;2.311]$ ,  $P=0.021$ ; second exclusion rule:  $\beta=1.964$ , s.e.=0.585,  $CI_{95\%}=[0.817;3.112]$ ,  $P<0.001$ ; government response indicators transformed:  $\beta=0.914$ , s.e.=0.494,  $CI_{95\%}=[-0.053;1.882]$ ,  $P=0.064$ ), workplaces (first exclusion rule:  $\beta=1.316$ , s.e.=0.511,  $CI_{95\%}=[0.314;2.317]$ ,  $P=0.010$ ; second exclusion rule:  $\beta=2.065$ , s.e.=0.635,  $CI_{95\%}=[0.820;3.310]$ ,  $P=0.001$ ; government response indicators transformed:  $\beta=1.115$ , s.e.=0.494,  $CI_{95\%}=[0.147;2.083]$ ,  $P=0.024$ ), and residential area (first exclusion rule:  $\beta=-1.141$ , s.e.=0.305,  $CI_{95\%}=[-1.739;-0.543]$ ,  $P<0.001$ ; second exclusion rule:  $\beta=-1.255$ , s.e.=0.321,  $CI_{95\%}=[-1.884;-0.626]$ ,  $P<0.001$ ; government response indicators transformed:  $\beta=-0.724$ , s.e.=0.259,  $CI_{95\%}=[-1.232;-0.215]$ ,  $P=0.005$ ). Transforming government response indicators rendered the significance of the interaction effects for going to grocery and pharmacy ( $\beta=0.466$ , s.e.=0.420,  $CI_{95\%}=[-0.356;1.289]$ ,  $P=0.267$ ; first exclusion rule:  $\beta=0.697$ , s.e.=0.406,  $CI_{95\%}=[-0.099;1.494]$ ,  $P=0.086$ ; second exclusion rule:  $\beta=0.800$ , s.e.=0.454,  $CI_{95\%}=[-0.091;1.691]$ ,  $P=0.078$ ). This suggests that the tendency to further reduce mobility on the weekends than during the week for low risk-tolerance regions (as compared to high risk-tolerance regions) is evident before pandemic declaration. Moreover, we see that the results with triple interactions between risk preference, weekend, and pandemic declaration resembles to that in the main text, albeit for regions with very high risk preference, the pre- and post-declaration difference in the weekend reduction in mobility is less precisely estimated in the second sample restriction, in particular for retail and recreation, grocery and pharmacy, and parks.

Lastly, we found some of the estimates of the risk preference-risk pool interaction terms is similar to that in the main analysis. For retail & recreation, the first exclusion rule ( $\beta=-0.365$ , s.e.=0.185,  $CI_{95\%}=[-0.729;-0.002]$ ,  $P=0.049$ ) and second exclusion rule ( $\beta=-0.550$ , s.e.=0.176,  $CI_{95\%}=[-0.894;-0.205]$ ,  $P=0.002$ ) both result in significant interaction terms, while transforming the government response indicators, the significance disappeared ( $\beta=-0.046$ , s.e.=0.163,  $CI_{95\%}=[-0.365;0.273]$ ,  $P=0.777$ ). For residential area, the negative interaction terms is highly robust (first exclusion rule:  $\beta=-0.167$ , s.e.=0.060,  $CI_{95\%}=[-0.284;-0.050]$ ,  $P=0.005$ ; second exclusion rule:  $\beta=-0.189$ , s.e.=0.063,  $CI_{95\%}=[-0.313;-0.066]$ ,  $P=0.003$ ; government response indicators transformed:  $\beta=-0.268$ , s.e.=0.045,  $CI_{95\%}=[-0.355;-0.181]$ ,  $P<0.001$ ). For other localities, the coefficient of the interaction term is consistently not statistically significant.

## Supplementary Figures

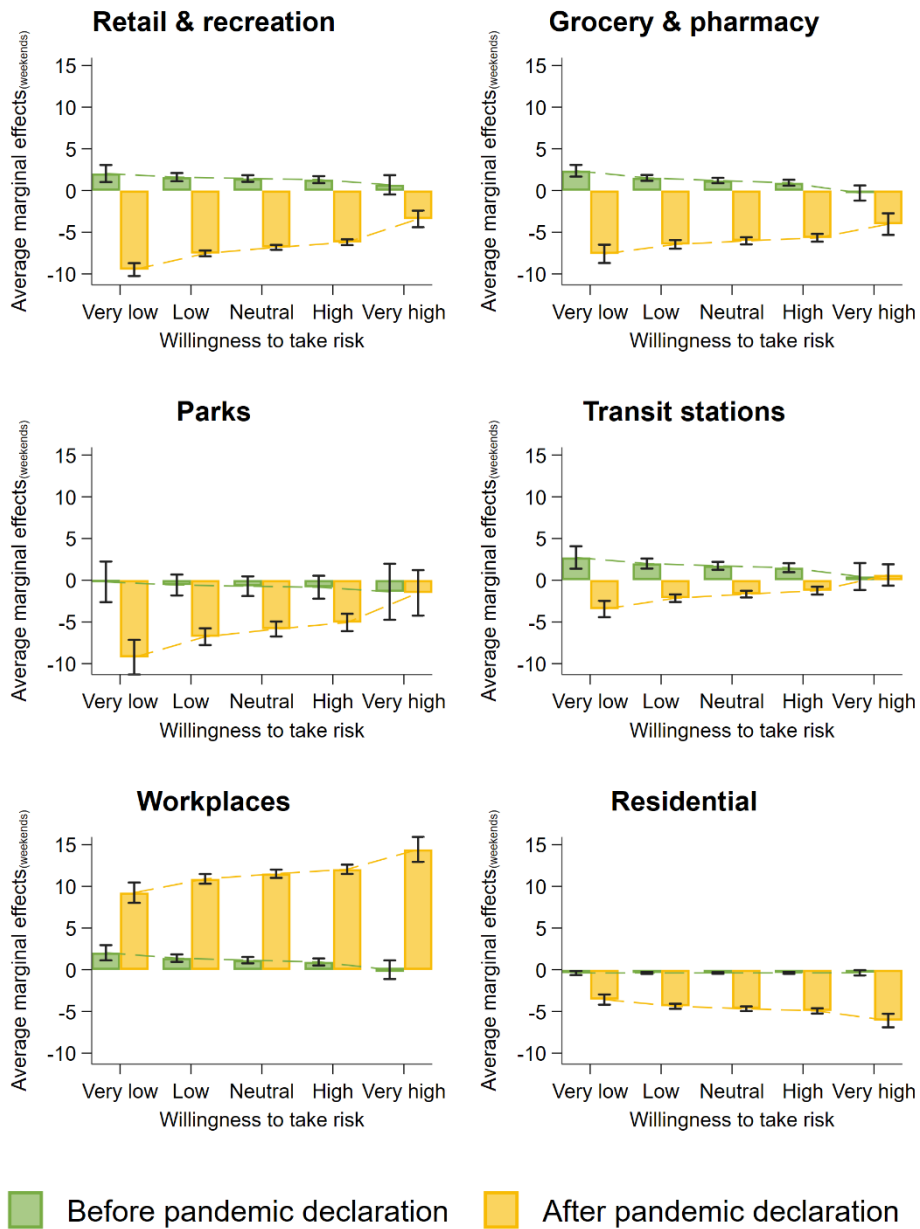

**Fig. S1 | Average marginal effects of weekends on mobility changes over risk attitudes, before and after pandemic declaration.**

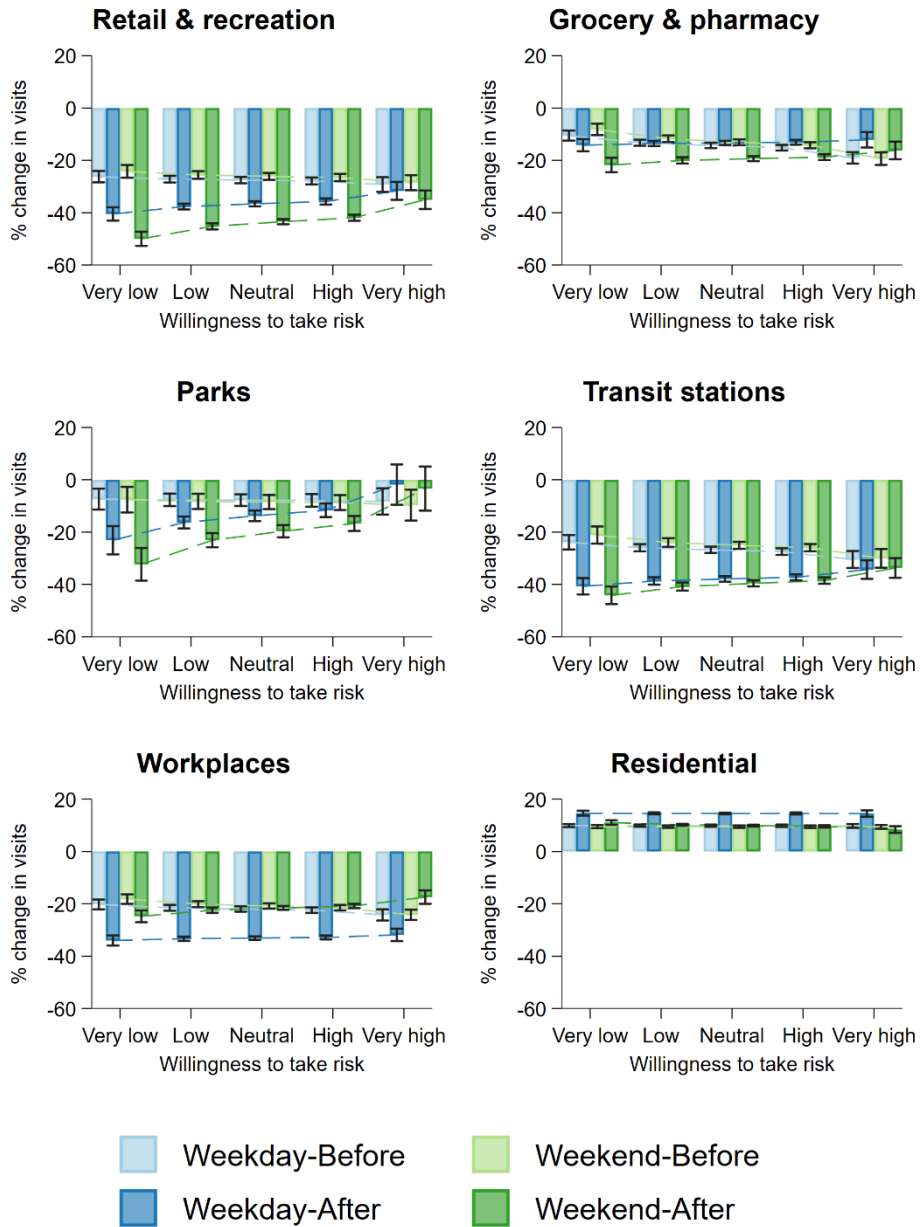

**Fig. S2 | Predicted change in mobility on weekdays and weekends and before and after pandemic declaration, over risk attitudes.**

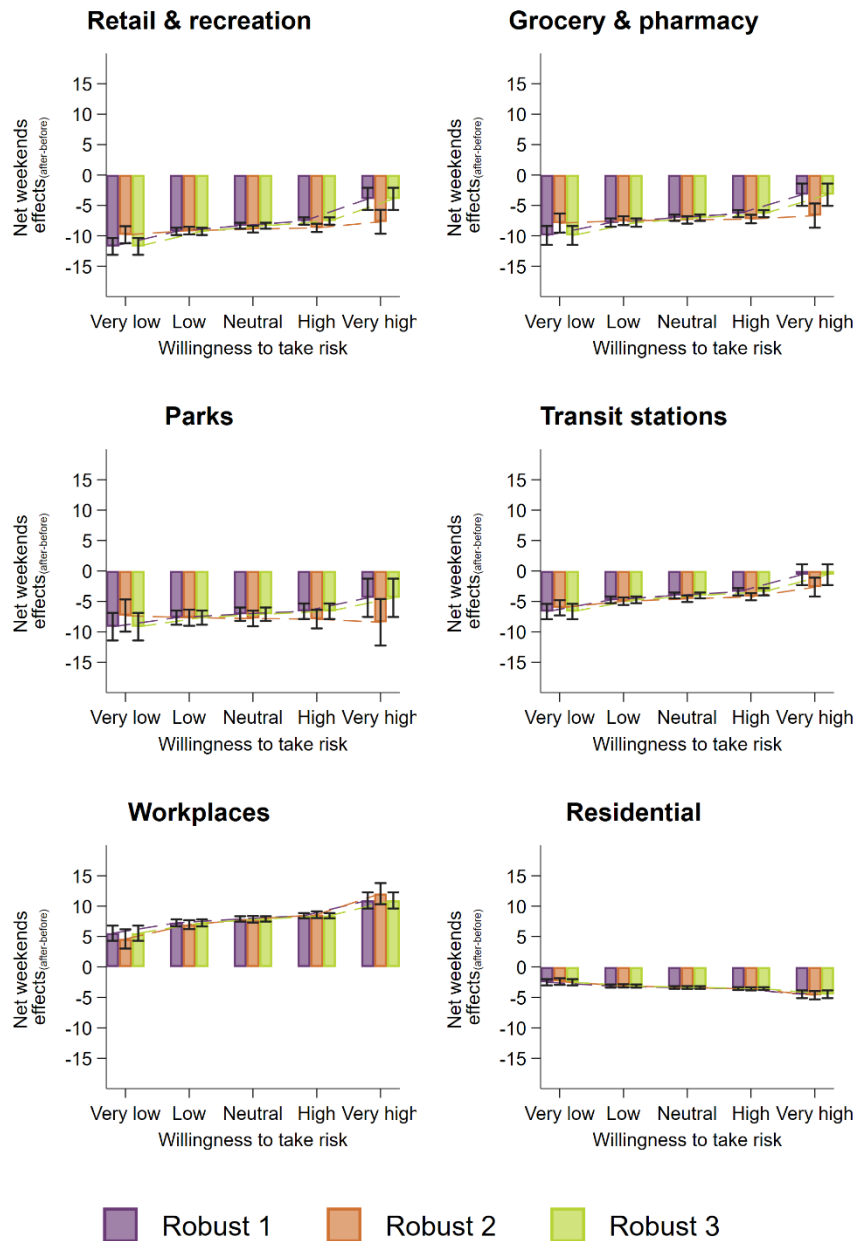

**Fig. S3 | Robustness checks on mediation from risk preference to change in weekends and weekdays visiting pattern before and after pandemic declaration.** Robust 1 = regions with at least one censored values on the outcome mobility measures excluded. Robust 2 = regions with at least one censored values on any mobility measures excluded. Robust 3 = government response indicators recoded as no measures taken if policy is not applied countrywide.

## Supplementary Tables

**Table S1 | Risk attitude and human mobility and during COVID-19**

|                                       | Retail & recreation | Grocery & pharmacy  | Parks               | Transit stations     | Workplaces          | Residential         |
|---------------------------------------|---------------------|---------------------|---------------------|----------------------|---------------------|---------------------|
| Risk-taking                           | 2.87*<br>(1.180)    | -0.48<br>(1.060)    | 7.67**<br>(2.577)   | 1.35<br>(1.350)      | 0.31<br>(0.848)     | -0.24<br>(0.374)    |
| Pandemic declaration                  | -11.8***<br>(0.879) | -1.42*<br>(0.711)   | -8.38***<br>(1.373) | -12.6***<br>(0.828)  | -8.38***<br>(0.649) | 3.62***<br>(0.287)  |
| Weekends                              | -4.39***<br>(0.132) | -3.97***<br>(0.167) | -4.54***<br>(0.446) | -0.79***<br>(0.189)  | 8.28***<br>(0.215)  | -3.28***<br>(0.110) |
| Days after first death                | 0.042†<br>(0.0216)  | 0.13***<br>(0.0171) | 0.056<br>(0.0352)   | -0.12***<br>(0.0242) | 0.046*<br>(0.0190)  | 0.017*<br>(0.00831) |
| <i>ln</i> (# confirmed cases+1)       | -2.32***<br>(0.466) | -1.86***<br>(0.395) | 1.69†<br>(0.881)    | 1.72***<br>(0.481)   | -1.53***<br>(0.358) | 0.13<br>(0.165)     |
| School                                |                     |                     |                     |                      |                     |                     |
| <i>Recommend closing</i>              | -7.61***<br>(2.103) | 0.98<br>(1.087)     | -30.9***<br>(4.999) | 2.17<br>(1.614)      | 3.95***<br>(1.037)  | 2.50***<br>(0.582)  |
| <i>Require closing (some)</i>         | 6.68***<br>(1.832)  | 1.08<br>(1.670)     | 15.6***<br>(3.185)  | 5.18†<br>(2.728)     | 0.11<br>(1.242)     | -1.43***<br>(0.284) |
| <i>Require closing</i>                | -6.65***<br>(0.764) | -5.53***<br>(0.600) | -4.26***<br>(1.151) | -2.75***<br>(0.736)  | -5.92***<br>(0.598) | 2.49***<br>(0.233)  |
| Workplace closing                     |                     |                     |                     |                      |                     |                     |
| <i>Recommend closing</i>              | -1.69†<br>(0.907)   | 5.47***<br>(0.904)  | 8.02***<br>(1.346)  | -3.09***<br>(0.930)  | 0.90<br>(0.845)     | -0.44<br>(0.302)    |
| <i>Require closing (some)</i>         | -23.5***<br>(1.224) | -7.33***<br>(1.097) | -3.29†<br>(1.825)   | -16.0***<br>(1.291)  | -11.9***<br>(0.881) | 4.03***<br>(0.371)  |
| <i>Require closing</i>                | -16.8***<br>(1.334) | -4.50***<br>(1.183) | -5.76*<br>(2.416)   | -17.5***<br>(1.367)  | -9.79***<br>(0.956) | 4.38***<br>(0.432)  |
| Public events                         |                     |                     |                     |                      |                     |                     |
| <i>Recommend cancelling</i>           | -0.69<br>(1.180)    | 2.56*<br>(1.017)    | -5.61***<br>(1.322) | -4.37**<br>(1.504)   | -2.34*<br>(0.793)   | 1.87***<br>(0.233)  |
| <i>Require cancelling</i>             | -5.04***<br>(0.716) | -0.42<br>(0.687)    | -3.91*<br>(1.652)   | -3.78***<br>(0.869)  | -4.06***<br>(0.674) | 2.45***<br>(0.229)  |
| Restrictions on gatherings            |                     |                     |                     |                      |                     |                     |
| <i>Above 1000 people</i>              | 10.5***<br>(1.003)  | 8.94***<br>(1.091)  | 1.69<br>(2.010)     | 4.17***<br>(1.258)   | 6.68***<br>(0.883)  | -3.87***<br>(0.320) |
| <i>101-1000 people</i>                | 4.97***<br>(1.245)  | 8.12***<br>(1.077)  | 2.58<br>(2.041)     | 2.30†<br>(1.366)     | 5.58***<br>(0.861)  | -2.41***<br>(0.323) |
| <i>11-100 people</i>                  | -1.29<br>(1.398)    | -1.06<br>(1.245)    | -5.11*<br>(2.456)   | -3.58*<br>(1.504)    | -4.64***<br>(1.083) | 0.011<br>(0.430)    |
| <i>10 people or less</i>              | -1.68<br>(1.192)    | -0.59<br>(1.065)    | -3.62†<br>(1.877)   | -3.53**<br>(1.257)   | -2.67**<br>(0.915)  | -0.21<br>(0.357)    |
| Public transport                      |                     |                     |                     |                      |                     |                     |
| <i>Recommend closing</i>              | -8.52***<br>(0.795) | -9.87***<br>(0.702) | -10.4***<br>(1.559) | -8.77***<br>(0.770)  | -10.8***<br>(0.613) | 4.31***<br>(0.253)  |
| <i>Require closing</i>                | -7.44***<br>(1.368) | -11.6***<br>(1.316) | -18.3***<br>(2.194) | -6.73***<br>(1.299)  | -5.22***<br>(1.003) | 2.84***<br>(0.473)  |
| Stay at home requirements             |                     |                     |                     |                      |                     |                     |
| <i>Recommend not leaving house</i>    | 3.40**<br>(1.172)   | 0.93<br>(0.815)     | 3.91*<br>(1.566)    | 1.89†<br>(1.071)     | 3.57***<br>(0.723)  | -0.93**<br>(0.314)  |
| <i>Require not leaving (loose)</i>    | -6.00***<br>(1.315) | -6.71***<br>(1.124) | -5.35*<br>(2.227)   | -4.59***<br>(1.201)  | -5.04***<br>(0.883) | 2.98***<br>(0.373)  |
| <i>Require not leaving (strict)</i>   | -19.5***<br>(1.757) | -25.7***<br>(1.526) | -18.2***<br>(3.059) | -15.0***<br>(1.809)  | -13.0***<br>(1.349) | 9.68***<br>(0.569)  |
| Internal movement                     |                     |                     |                     |                      |                     |                     |
| <i>Recommend movement restriction</i> | -9.05***<br>(0.841) | -6.87***<br>(0.665) | -7.09***<br>(1.714) | -10.4***<br>(0.828)  | -3.70***<br>(0.530) | 1.98***<br>(0.258)  |
| <i>Restrict movement</i>              | -7.75***<br>(1.180) | -6.59***<br>(0.836) | -1.99<br>(2.681)    | -8.96***<br>(1.086)  | -6.41***<br>(0.702) | 1.97***<br>(0.355)  |
| % population ages 65                  | -0.023              | -0.71***            | -0.35               | -0.30†               | -0.36***            | -0.032              |



|                                     |                       |                       |                     |                       |                       |                        |
|-------------------------------------|-----------------------|-----------------------|---------------------|-----------------------|-----------------------|------------------------|
| and above                           | (0.135)               | (0.141)               | (0.396)             | (0.166)               | (0.0924)              | (0.0411)               |
| Population density (per sq. km)     | -0.013**<br>(0.00419) | -0.0014<br>(0.00379)  | -0.0048<br>(0.0108) | -0.0051<br>(0.00590)  | -0.010**<br>(0.00357) | 0.0049***<br>(0.00119) |
| Unemployment (% labour force)       | -0.84***<br>(0.0978)  | -0.37***<br>(0.100)   | -1.70***<br>(0.250) | -0.66***<br>(0.0995)  | -0.27***<br>(0.0639)  | 0.21***<br>(0.0320)    |
| GDP per capita (2010 US\$ constant) | 1.74†<br>(1.057)      | 6.72***<br>(1.018)    | 19.7***<br>(3.100)  | 3.97**<br>(1.250)     | -0.57<br>(0.789)      | -1.11**<br>(0.413)     |
| Urban population (% total)          | -0.18***<br>(0.0382)  | -0.25***<br>(0.0413)  | -0.99***<br>(0.102) | -0.34***<br>(0.0531)  | -0.10**<br>(0.0336)   | 0.078***<br>(0.0144)   |
| Average temperature (tenths of °C)  | 0.030***<br>(0.00436) | 0.025***<br>(0.00402) | 0.19***<br>(0.0103) | 0.037***<br>(0.00475) | -0.0019<br>(0.00336)  | -0.015***<br>(0.00138) |
| Average household size              | -1.27<br>(1.075)      | -3.60*<br>(1.506)     | -12.7*<br>(5.192)   | -2.22<br>(1.485)      | 0.74<br>(0.771)       | 0.27<br>(0.449)        |
| Constant                            | 8.05<br>(10.31)       | -23.3*<br>(11.73)     | -81.8*<br>(38.70)   | 0.73<br>(12.70)       | 19.5**<br>(7.033)     | 5.31<br>(4.377)        |
| Observations                        | 64800                 | 64613                 | 58858               | 62958                 | 67073                 | 58284                  |
| Number of clusters                  | 796                   | 785                   | 738                 | 761                   | 798                   | 741                    |
| Prob. > $\chi^2$                    | 0.000                 | 0.000                 | 0.000               | 0.000                 | 0.000                 | 0.000                  |
| $R^2_{\text{between}}$              | 0.849                 | 0.578                 | 0.367               | 0.821                 | 0.782                 | 0.823                  |
| $R^2_{\text{within}}$               | 0.519                 | 0.427                 | 0.193               | 0.217                 | 0.512                 | 0.557                  |
| $R^2_{\text{overall}}$              | 0.789                 | 0.538                 | 0.290               | 0.700                 | 0.743                 | 0.771                  |

Notes: Results corresponds to Figure 1 in the main text. Random-effects GLS regression estimates. Standard errors (clustered at regional level) in parentheses. †  $p < .10$ ; \*  $p < .05$ ; \*\*  $p < .01$ ; \*\*\*  $p < .001$ . Reference categories are: *Before WHO declares COVID-19 as pandemic*, *Weekdays* and *No measures taken* for all government response indicators.

**Table S2 | Change in visits to six location categories predicted by average individual risk preference before and after pandemic declaration.**

|                                       | Retail & recreation | Grocery & pharmacy  | Parks               | Transit stations     | Workplaces          | Residential         |
|---------------------------------------|---------------------|---------------------|---------------------|----------------------|---------------------|---------------------|
| Risk-taking                           | -1.55<br>(1.078)    | -4.45***<br>(0.898) | -0.46<br>(1.963)    | -3.53*<br>(1.382)    | -2.40**<br>(0.797)  | -0.067<br>(0.234)   |
| Pandemic declaration                  | -11.3***<br>(0.879) | -0.99<br>(0.705)    | -7.30***<br>(1.379) | -12.0***<br>(0.833)  | -8.10***<br>(0.642) | 3.60***<br>(0.285)  |
| Pandemic declaration<br>*Risk-taking  | 6.72***<br>(1.166)  | 5.98***<br>(1.013)  | 11.9***<br>(2.449)  | 7.17***<br>(1.422)   | 4.02***<br>(0.871)  | -0.27<br>(0.423)    |
| Weekends                              | -4.40***<br>(0.132) | -3.98***<br>(0.167) | -4.55***<br>(0.447) | -0.80***<br>(0.189)  | 8.27***<br>(0.215)  | -3.28***<br>(0.110) |
| Days after first death                | 0.047*<br>(0.0211)  | 0.14***<br>(0.0167) | 0.062†<br>(0.0350)  | -0.11***<br>(0.0236) | 0.048**<br>(0.0187) | 0.017*<br>(0.00831) |
| ln(# confirmed cases+1)               | -2.41***<br>(0.461) | -1.94***<br>(0.390) | 1.52†<br>(0.871)    | 1.60***<br>(0.471)   | -1.58***<br>(0.354) | 0.14<br>(0.164)     |
| School                                |                     |                     |                     |                      |                     |                     |
| <i>Recommend closing</i>              | -7.23***<br>(2.142) | 1.30<br>(1.099)     | -30.6***<br>(5.076) | 2.46<br>(1.632)      | 4.20***<br>(1.047)  | 2.49***<br>(0.583)  |
| <i>Require closing (some)</i>         | 6.78***<br>(1.845)  | 1.18<br>(1.677)     | 15.7***<br>(3.227)  | 5.37*<br>(2.731)     | 0.18<br>(1.248)     | -1.44***<br>(0.287) |
| <i>Require closing</i>                | -6.48***<br>(0.796) | -5.37***<br>(0.603) | -3.95***<br>(1.164) | -2.55***<br>(0.747)  | -5.82***<br>(0.611) | 2.48***<br>(0.235)  |
| Workplace closing                     |                     |                     |                     |                      |                     |                     |
| <i>Recommend closing</i>              | -1.69†<br>(0.881)   | 5.49***<br>(0.886)  | 8.33***<br>(1.351)  | -2.95**<br>(0.910)   | 0.93<br>(0.832)     | -0.44<br>(0.302)    |
| <i>Require closing (some)</i>         | -23.1***<br>(1.206) | -6.99***<br>(1.091) | -2.45<br>(1.817)    | -15.5***<br>(1.273)  | -11.6***<br>(0.876) | 4.01***<br>(0.369)  |
| <i>Require closing</i>                | -16.4***<br>(1.316) | -4.17***<br>(1.182) | -5.07*<br>(2.403)   | -17.1***<br>(1.345)  | -9.51***<br>(0.951) | 4.37***<br>(0.433)  |
| Public events                         |                     |                     |                     |                      |                     |                     |
| <i>Recommend cancelling</i>           | -0.85<br>(1.172)    | 2.40*<br>(1.009)    | -5.91***<br>(1.313) | -4.61**<br>(1.496)   | -2.45**<br>(0.798)  | 1.88***<br>(0.235)  |
| <i>Require cancelling</i>             | -5.51***<br>(0.711) | -0.84<br>(0.686)    | -4.83**<br>(1.637)  | -4.32***<br>(0.863)  | -4.36***<br>(0.678) | 2.47***<br>(0.230)  |
| Restrictions on gatherings            |                     |                     |                     |                      |                     |                     |
| <i>Above 1000 people</i>              | 11.1***<br>(1.015)  | 9.52***<br>(1.093)  | 2.61<br>(2.042)     | 4.90***<br>(1.264)   | 7.09***<br>(0.888)  | -3.89***<br>(0.320) |
| <i>101-1000 people</i>                | 4.70***<br>(1.263)  | 7.89***<br>(1.086)  | 1.92<br>(2.100)     | 1.96<br>(1.380)      | 5.42***<br>(0.875)  | -2.39***<br>(0.327) |
| <i>11-100 people</i>                  | -2.10<br>(1.418)    | -1.75<br>(1.267)    | -6.58**<br>(2.381)  | -4.46**<br>(1.535)   | -5.11***<br>(1.103) | 0.049<br>(0.444)    |
| <i>10 people or less</i>              | -2.12†<br>(1.213)   | -0.95<br>(1.083)    | -4.27*<br>(1.923)   | -4.00**<br>(1.277)   | -2.92**<br>(0.929)  | -0.19<br>(0.363)    |
| Public transport                      |                     |                     |                     |                      |                     |                     |
| <i>Recommend closing</i>              | -8.43***<br>(0.792) | -9.79***<br>(0.696) | -10.1***<br>(1.558) | -8.61***<br>(0.772)  | -10.8***<br>(0.613) | 4.30***<br>(0.254)  |
| <i>Require closing</i>                | -7.14***<br>(1.359) | -11.3***<br>(1.317) | -17.5***<br>(2.194) | -6.31***<br>(1.295)  | -5.13***<br>(1.000) | 2.82***<br>(0.475)  |
| Stay at home requirements             |                     |                     |                     |                      |                     |                     |
| <i>Recommend not leaving house</i>    | 3.46**<br>(1.180)   | 0.96<br>(0.831)     | 4.06**<br>(1.571)   | 1.96†<br>(1.097)     | 3.58***<br>(0.744)  | -0.94**<br>(0.317)  |
| <i>Require not leaving (loose)</i>    | -6.22***<br>(1.310) | -6.93***<br>(1.128) | -5.55*<br>(2.221)   | -4.76**<br>(1.209)   | -5.17***<br>(0.890) | 2.98***<br>(0.372)  |
| <i>Require not leaving (strict)</i>   | -19.7***<br>(1.720) | -25.9***<br>(1.530) | -18.6***<br>(3.022) | -15.3***<br>(1.783)  | -13.2***<br>(1.329) | 9.68***<br>(0.570)  |
| Internal movement                     |                     |                     |                     |                      |                     |                     |
| <i>Recommend movement restriction</i> | -8.38***<br>(0.843) | -6.28***<br>(0.675) | -6.26***<br>(1.724) | -9.79***<br>(0.836)  | -3.33***<br>(0.533) | 1.96***<br>(0.255)  |
| <i>Restrict movement</i>              | -7.68***<br>(1.157) | -6.53***<br>(0.823) | -2.36<br>(2.654)    | -9.04***<br>(1.065)  | -6.41***<br>(0.696) | 1.98***<br>(0.354)  |
| % population ages 65                  | -0.067              | -0.75***            | -0.44               | -0.35*               | -0.38***            | -0.030              |

|                                     |                       |                       |                     |                       |                       |                        |
|-------------------------------------|-----------------------|-----------------------|---------------------|-----------------------|-----------------------|------------------------|
| and above                           | (0.135)               | (0.143)               | (0.402)             | (0.167)               | (0.0915)              | (0.0413)               |
| Population density (per sq. km)     | -0.013**<br>(0.00421) | -0.0017<br>(0.00381)  | -0.0056<br>(0.0108) | -0.0055<br>(0.00591)  | -0.011**<br>(0.00357) | 0.0049***<br>(0.00120) |
| Unemployment (% labour force)       | -0.85***<br>(0.0981)  | -0.38***<br>(0.102)   | -1.71***<br>(0.251) | -0.67***<br>(0.101)   | -0.28***<br>(0.0644)  | 0.21***<br>(0.0321)    |
| GDP per capita (2010 US\$ constant) | 1.96†<br>(1.065)      | 6.91***<br>(1.028)    | 20.2***<br>(3.129)  | 4.28***<br>(1.260)    | -0.45<br>(0.787)      | -1.12**<br>(0.412)     |
| Urban population (% total)          | -0.19***<br>(0.0386)  | -0.25***<br>(0.0415)  | -1.00***<br>(0.102) | -0.35***<br>(0.0533)  | -0.11**<br>(0.0336)   | 0.079***<br>(0.0144)   |
| Average temperature (tenths of °C)  | 0.032***<br>(0.00428) | 0.027***<br>(0.00401) | 0.19***<br>(0.0103) | 0.039***<br>(0.00468) | -0.00050<br>(0.00332) | -0.015***<br>(0.00137) |
| Average household size              | -1.50<br>(1.098)      | -3.79*<br>(1.541)     | -13.1*<br>(5.299)   | -2.42<br>(1.517)      | 0.59<br>(0.760)       | 0.28<br>(0.450)        |
| Constant                            | 7.47<br>(10.44)       | -23.9*<br>(11.94)     | -84.7*<br>(39.29)   | -0.93<br>(12.88)      | 19.2**<br>(7.014)     | 5.37<br>(4.379)        |
| Observations                        | 64800                 | 64613                 | 58858               | 62958                 | 67073                 | 58284                  |
| Number of clusters                  | 796                   | 785                   | 738                 | 761                   | 798                   | 741                    |
| Prob. > $\chi^2$                    | 0.000                 | 0.000                 | 0.000               | 0.000                 | 0.000                 | 0.000                  |
| $R^2_{\text{between}}$              | 0.850                 | 0.581                 | 0.372               | 0.823                 | 0.783                 | 0.823                  |
| $R^2_{\text{within}}$               | 0.520                 | 0.426                 | 0.191               | 0.218                 | 0.512                 | 0.557                  |
| $R^2_{\text{overall}}$              | 0.791                 | 0.540                 | 0.291               | 0.702                 | 0.744                 | 0.771                  |

Notes: Results corresponds to Figure 2 in the main text. Random-effects GLS regression estimates. Standard errors (clustered at regional level) in parentheses. †  $p < .10$ ; \*  $p < .05$ ; \*\*  $p < .01$ ; \*\*\*  $p < .001$ . Reference categories are: *Before WHO declares COVID-19 as pandemic*, *Weekdays* and *No measures taken* for all government response indicators.

**Table S3 | Visitation pattern by weekdays and weekends over average individual risk preference.**

|                                       | Retail & recreation | Grocery & pharmacy  | Parks               | Transit stations     | Workplaces           | Residential         |
|---------------------------------------|---------------------|---------------------|---------------------|----------------------|----------------------|---------------------|
| Risk-taking                           | 2.33*<br>(1.184)    | -0.73<br>(1.050)    | 7.00**<br>(2.537)   | 1.04<br>(1.352)      | -0.064<br>(0.862)    | -0.057<br>(0.391)   |
| Weekends                              | -4.27***<br>(0.130) | -3.92***<br>(0.164) | -4.39***<br>(0.450) | -0.72***<br>(0.185)  | 8.34***<br>(0.213)   | -3.35***<br>(0.109) |
| Weekends*Risk-taking                  | 2.01***<br>(0.318)  | 0.92*<br>(0.411)    | 2.26*<br>(1.015)    | 1.18*<br>(0.502)     | 1.38**<br>(0.506)    | -0.79**<br>(0.260)  |
| Pandemic declaration                  | -11.8***<br>(0.879) | -1.42*<br>(0.711)   | -8.38***<br>(1.373) | -12.5***<br>(0.828)  | -8.38***<br>(0.648)  | 3.62***<br>(0.287)  |
| Days after first death                | 0.042†<br>(0.0216)  | 0.13***<br>(0.0171) | 0.056<br>(0.0351)   | -0.12***<br>(0.0242) | 0.046*<br>(0.0190)   | 0.017*<br>(0.00831) |
| ln(# confirmed cases+1)               | -2.31***<br>(0.466) | -1.86***<br>(0.395) | 1.70†<br>(0.881)    | 1.72***<br>(0.482)   | -1.52***<br>(0.358)  | 0.13<br>(0.165)     |
| School                                |                     |                     |                     |                      |                      |                     |
| <i>Recommend closing</i>              | -7.77***<br>(2.111) | 0.90<br>(1.086)     | -31.1***<br>(5.010) | 2.07<br>(1.617)      | 3.84***<br>(1.033)   | 2.57***<br>(0.585)  |
| <i>Require closing (some)</i>         | 6.62***<br>(1.834)  | 1.05<br>(1.670)     | 15.5***<br>(3.189)  | 5.15†<br>(2.729)     | 0.066<br>(1.246)     | -1.41***<br>(0.285) |
| <i>Require closing</i>                | -6.68***<br>(0.763) | -5.54***<br>(0.599) | -4.29***<br>(1.151) | -2.77***<br>(0.737)  | -5.94***<br>(0.598)  | 2.50***<br>(0.233)  |
| Workplace closing                     |                     |                     |                     |                      |                      |                     |
| <i>Recommend closing</i>              | -1.69†<br>(0.907)   | 5.48***<br>(0.904)  | 8.02***<br>(1.346)  | -3.09***<br>(0.930)  | 0.90<br>(0.845)      | -0.44<br>(0.302)    |
| <i>Require closing (some)</i>         | -23.5***<br>(1.224) | -7.33***<br>(1.097) | -3.30†<br>(1.825)   | -16.0***<br>(1.290)  | -11.9***<br>(0.881)  | 4.03***<br>(0.371)  |
| <i>Require closing</i>                | -16.8***<br>(1.334) | -4.49***<br>(1.183) | -5.76*<br>(2.416)   | -17.5***<br>(1.367)  | -9.78***<br>(0.956)  | 4.38***<br>(0.432)  |
| Public events                         |                     |                     |                     |                      |                      |                     |
| <i>Recommend cancelling</i>           | -0.64<br>(1.180)    | 2.58*<br>(1.017)    | -5.57***<br>(1.323) | -4.34**<br>(1.503)   | -2.31**<br>(0.791)   | 1.86***<br>(0.233)  |
| <i>Require cancelling</i>             | -5.06***<br>(0.717) | -0.42<br>(0.687)    | -3.91*<br>(1.652)   | -3.79***<br>(0.869)  | -4.06***<br>(0.675)  | 2.45***<br>(0.229)  |
| Restrictions on gatherings            |                     |                     |                     |                      |                      |                     |
| <i>Above 1000 people</i>              | 10.5***<br>(1.003)  | 8.96***<br>(1.091)  | 1.72<br>(2.009)     | 4.18***<br>(1.258)   | 6.69***<br>(0.883)   | -3.87***<br>(0.320) |
| <i>101-1000 people</i>                | 5.04***<br>(1.246)  | 8.15***<br>(1.078)  | 2.64<br>(2.041)     | 2.34†<br>(1.367)     | 5.63***<br>(0.862)   | -2.43***<br>(0.323) |
| <i>11-100 people</i>                  | -1.23<br>(1.397)    | -1.03<br>(1.245)    | -5.06*<br>(2.454)   | -3.54*<br>(1.505)    | -4.60***<br>(1.083)  | -0.0035<br>(0.430)  |
| <i>10 people or less</i>              | -1.65<br>(1.191)    | -0.58<br>(1.065)    | -3.59†<br>(1.877)   | -3.51**<br>(1.257)   | -2.65**<br>(0.914)   | -0.21<br>(0.357)    |
| Public transport                      |                     |                     |                     |                      |                      |                     |
| <i>Recommend closing</i>              | -8.53***<br>(0.795) | -9.88***<br>(0.702) | -10.4***<br>(1.560) | -8.78***<br>(0.770)  | -10.8***<br>(0.613)  | 4.31***<br>(0.253)  |
| <i>Require closing</i>                | -7.46***<br>(1.367) | -11.6***<br>(1.317) | -18.3***<br>(2.194) | -6.75***<br>(1.298)  | -5.24***<br>(1.003)  | 2.84***<br>(0.473)  |
| Stay at home requirements             |                     |                     |                     |                      |                      |                     |
| <i>Recommend not leaving house</i>    | 3.41**<br>(1.172)   | 0.94<br>(0.815)     | 3.92*<br>(1.565)    | 1.90†<br>(1.071)     | 3.58***<br>(0.722)   | -0.94**<br>(0.314)  |
| <i>Require not leaving (loose)</i>    | -5.98***<br>(1.315) | -6.70***<br>(1.123) | -5.33*<br>(2.227)   | -4.58***<br>(1.201)  | -5.03***<br>(0.881)  | 2.97***<br>(0.373)  |
| <i>Require not leaving (strict)</i>   | -19.5***<br>(1.756) | -25.7***<br>(1.526) | -18.2***<br>(3.060) | -15.0***<br>(1.808)  | -12.9***<br>(1.348)  | 9.67***<br>(0.569)  |
| Internal movement                     |                     |                     |                     |                      |                      |                     |
| <i>Recommend movement restriction</i> | -9.10***<br>(0.841) | -6.89***<br>(0.665) | -7.14***<br>(1.716) | -10.4***<br>(0.828)  | -3.73***<br>(0.528)  | 2.00***<br>(0.258)  |
| <i>Restrict movement</i>              | -7.76***<br>(1.180) | -6.59***<br>(0.835) | -1.99<br>(2.681)    | -8.96***<br>(1.085)  | -6.41***<br>(0.701)  | 1.97***<br>(0.355)  |
| % population ages 65 and above        | -0.019<br>(0.135)   | -0.71***<br>(0.142) | -0.35<br>(0.396)    | -0.30†<br>(0.166)    | -0.36***<br>(0.0926) | -0.033<br>(0.0412)  |

|                                     |                       |                       |                     |                       |                       |                        |
|-------------------------------------|-----------------------|-----------------------|---------------------|-----------------------|-----------------------|------------------------|
| Population density (per sq. km)     | -0.013**<br>(0.00420) | -0.0014<br>(0.00380)  | -0.0049<br>(0.0108) | -0.0051<br>(0.00590)  | -0.010**<br>(0.00357) | 0.0049***<br>(0.00119) |
| Unemployment (% labour force)       | -0.84***<br>(0.0976)  | -0.37***<br>(0.100)   | -1.70***<br>(0.249) | -0.66***<br>(0.0994)  | -0.27***<br>(0.0639)  | 0.21***<br>(0.0320)    |
| GDP per capita (2010 US\$ constant) | 1.72<br>(1.056)       | 6.71***<br>(1.018)    | 19.6***<br>(3.101)  | 3.96**<br>(1.251)     | -0.57<br>(0.790)      | -1.10**<br>(0.413)     |
| Urban population (% total)          | -0.18***<br>(0.0382)  | -0.25***<br>(0.0413)  | -0.99***<br>(0.102) | -0.34***<br>(0.0531)  | -0.10**<br>(0.0336)   | 0.078***<br>(0.0144)   |
| Average temperature (tenths of °C)  | 0.030***<br>(0.00436) | 0.025***<br>(0.00402) | 0.19***<br>(0.0103) | 0.037***<br>(0.00475) | -0.0020<br>(0.00336)  | -0.015***<br>(0.00139) |
| Average household size              | -1.26<br>(1.075)      | -3.59*<br>(1.506)     | -12.7*<br>(5.197)   | -2.22<br>(1.486)      | 0.74<br>(0.770)       | 0.27<br>(0.449)        |
| Constant                            | 8.12<br>(10.30)       | -23.3*<br>(11.73)     | -81.7*<br>(38.73)   | 0.78<br>(12.71)       | 19.5**<br>(7.036)     | 5.29<br>(4.379)        |
| Observations                        | 64800                 | 64613                 | 58858               | 62958                 | 67073                 | 58284                  |
| Number of clusters                  | 796                   | 785                   | 738                 | 761                   | 798                   | 741                    |
| Prob. > $\chi^2$                    | 0.000                 | 0.000                 | 0.000               | 0.000                 | 0.000                 | 0.000                  |
| $R^2_{\text{between}}$              | 0.849                 | 0.579                 | 0.367               | 0.822                 | 0.782                 | 0.823                  |
| $R^2_{\text{within}}$               | 0.520                 | 0.427                 | 0.193               | 0.216                 | 0.511                 | 0.557                  |
| $R^2_{\text{overall}}$              | 0.790                 | 0.538                 | 0.291               | 0.700                 | 0.743                 | 0.771                  |

Notes: Results corresponds to Figure 3 in the main text. Random-effects GLS regression estimates. Standard errors (clustered at regional level) in parentheses. †  $p < .10$ ; \*  $p < .05$ ; \*\*  $p < .01$ ; \*\*\*  $p < .001$ . Reference categories are: *Before WHO declares COVID-19 as pandemic*, *Weekdays* and *No measures taken* for all government response indicators.

**Table S4 | Mediation from risk preference to change in weekends and weekdays visiting pattern pre- and post-pandemic declaration.**

|                                           | Retail & recreation | Grocery & pharmacy  | Parks               | Transit stations     | Workplaces          | Residential          |
|-------------------------------------------|---------------------|---------------------|---------------------|----------------------|---------------------|----------------------|
| Risk-taking                               | -1.22<br>(1.079)    | -3.93***<br>(0.879) | -0.11<br>(1.913)    | -3.01*<br>(1.360)    | -1.94*<br>(0.848)   | -0.072<br>(0.242)    |
| Weekends                                  | 1.51***<br>(0.205)  | 1.22***<br>(0.164)  | -1.16†<br>(0.623)   | 1.87***<br>(0.245)   | 1.20***<br>(0.192)  | -0.43***<br>(0.0542) |
| Weekends*Risk-taking                      | -1.32*<br>(0.552)   | -1.88***<br>(0.399) | -1.48<br>(1.387)    | -1.88*<br>(0.762)    | -1.28**<br>(0.469)  | 0.10<br>(0.152)      |
| Pandemic declaration                      | -8.93***<br>(0.861) | 1.11†<br>(0.675)    | -5.97***<br>(1.336) | -11.0***<br>(0.813)  | -11.0***<br>(0.634) | 4.71***<br>(0.285)   |
| Pandemic declaration *Risk-taking         | 5.46***<br>(1.131)  | 4.87***<br>(0.958)  | 10.3***<br>(2.346)  | 5.94***<br>(1.359)   | 2.80**<br>(0.886)   | 0.057<br>(0.443)     |
| Weekends*Pandemic declaration             | -8.52***<br>(0.243) | -7.54***<br>(0.261) | -4.67***<br>(0.582) | -3.75***<br>(0.266)  | 10.4***<br>(0.249)  | -4.36***<br>(0.124)  |
| Weekends*Pandemic declaration*Risk-taking | 5.04***<br>(0.707)  | 4.27***<br>(0.698)  | 5.99***<br>(1.532)  | 4.70***<br>(0.884)   | 4.01***<br>(0.665)  | -1.40***<br>(0.290)  |
| Days after first death                    | 0.049*<br>(0.0211)  | 0.14***<br>(0.0166) | 0.063†<br>(0.0349)  | -0.11***<br>(0.0236) | 0.045*<br>(0.0188)  | 0.019*<br>(0.00833)  |
| ln(# confirmed cases+1)                   | -2.38***<br>(0.459) | -1.92***<br>(0.388) | 1.55†<br>(0.871)    | 1.62***<br>(0.470)   | -1.58***<br>(0.356) | 0.12<br>(0.165)      |
| School                                    |                     |                     |                     |                      |                     |                      |
| <i>Recommend closing</i>                  | -6.88**<br>(2.129)  | 1.63<br>(1.105)     | -30.5***<br>(5.095) | 2.53<br>(1.632)      | 3.25**<br>(1.040)   | 2.92***<br>(0.604)   |
| <i>Require closing (some)</i>             | 6.85***<br>(1.849)  | 1.25<br>(1.689)     | 15.9***<br>(3.232)  | 5.39*<br>(2.735)     | 0.046<br>(1.242)    | -1.40***<br>(0.284)  |
| <i>Require closing</i>                    | -6.49***<br>(0.807) | -5.39***<br>(0.612) | -3.95***<br>(1.169) | -2.54***<br>(0.751)  | -5.80***<br>(0.598) | 2.50***<br>(0.230)   |
| Workplace closing                         |                     |                     |                     |                      |                     |                      |
| <i>Recommend closing</i>                  | -1.67†<br>(0.885)   | 5.51***<br>(0.893)  | 8.36***<br>(1.353)  | -2.94**<br>(0.913)   | 0.98<br>(0.818)     | -0.46<br>(0.299)     |
| <i>Require closing (some)</i>             | -23.1***<br>(1.206) | -7.03***<br>(1.090) | -2.43<br>(1.817)    | -15.5***<br>(1.272)  | -11.6***<br>(0.876) | 3.94***<br>(0.370)   |
| <i>Require closing</i>                    | -16.5***<br>(1.314) | -4.21***<br>(1.182) | -5.07*<br>(2.404)   | -17.1***<br>(1.344)  | -9.49***<br>(0.954) | 4.35***<br>(0.434)   |
| Public events                             |                     |                     |                     |                      |                     |                      |
| <i>Recommend cancelling</i>               | -1.02<br>(1.170)    | 2.23*<br>(1.006)    | -5.98***<br>(1.319) | -4.69**<br>(1.494)   | -2.15**<br>(0.794)  | 1.70***<br>(0.232)   |
| <i>Require cancelling</i>                 | -4.93***<br>(0.708) | -0.31<br>(0.689)    | -4.58**<br>(1.632)  | -4.08***<br>(0.860)  | -5.09***<br>(0.687) | 2.74***<br>(0.237)   |
| Restrictions on gatherings                |                     |                     |                     |                      |                     |                      |
| <i>Above 1000 people</i>                  | 10.7***<br>(1.014)  | 9.13***<br>(1.094)  | 2.40<br>(2.043)     | 4.72***<br>(1.264)   | 7.69***<br>(0.893)  | -4.10***<br>(0.323)  |
| <i>101-1000 people</i>                    | 4.20***<br>(1.266)  | 7.43***<br>(1.095)  | 1.75<br>(2.106)     | 1.74<br>(1.384)      | 6.13***<br>(0.870)  | -2.64***<br>(0.325)  |
| <i>11-100 people</i>                      | -2.82*<br>(1.418)   | -2.39†<br>(1.272)   | -6.97**<br>(2.390)  | -4.79**<br>(1.534)   | -4.18***<br>(1.109) | -0.26<br>(0.449)     |
| <i>10 people or less</i>                  | -2.67*<br>(1.220)   | -1.44<br>(1.087)    | -4.56*<br>(1.926)   | -4.26***<br>(1.279)  | -2.22*<br>(0.924)   | -0.47<br>(0.364)     |
| Public transport                          |                     |                     |                     |                      |                     |                      |
| <i>Recommend closing</i>                  | -8.47***<br>(0.789) | -9.83***<br>(0.696) | -10.1***<br>(1.561) | -8.65***<br>(0.771)  | -10.8***<br>(0.616) | 4.27***<br>(0.256)   |
| <i>Require closing</i>                    | -7.22***<br>(1.352) | -11.4***<br>(1.314) | -17.6***<br>(2.196) | -6.36***<br>(1.291)  | -5.14***<br>(1.007) | 2.81***<br>(0.481)   |
| Stay at home requirements                 |                     |                     |                     |                      |                     |                      |
| <i>Recommend not leaving house</i>        | 3.78**<br>(1.189)   | 1.23<br>(0.835)     | 4.31**<br>(1.569)   | 2.15*<br>(1.096)     | 3.36***<br>(0.735)  | -0.79*<br>(0.315)    |
| <i>Require not leaving (loose)</i>        | -6.07***<br>(1.311) | -6.81***<br>(1.127) | -5.40*<br>(2.223)   | -4.65***<br>(1.207)  | -5.21***<br>(0.886) | 3.03***<br>(0.373)   |

|                                       |                       |                       |                     |                       |                       |                        |
|---------------------------------------|-----------------------|-----------------------|---------------------|-----------------------|-----------------------|------------------------|
| <i>Require not leaving (strict)</i>   | -19.5***<br>(1.715)   | -25.8***<br>(1.531)   | -18.4***<br>(3.024) | -15.2***<br>(1.779)   | -13.1***<br>(1.335)   | 9.75***<br>(0.570)     |
| Internal movement                     |                       |                       |                     |                       |                       |                        |
| <i>Recommend movement restriction</i> | -8.33***<br>(0.837)   | -6.23***<br>(0.674)   | -6.26***<br>(1.725) | -9.78***<br>(0.833)   | -3.50***<br>(0.534)   | 2.02***<br>(0.256)     |
| <i>Restrict movement</i>              | -7.66***<br>(1.152)   | -6.49***<br>(0.827)   | -2.33<br>(2.662)    | -9.03***<br>(1.063)   | -6.45***<br>(0.699)   | 1.98***<br>(0.353)     |
| % population ages 65 and above        | -0.080<br>(0.135)     | -0.76***<br>(0.142)   | -0.45<br>(0.402)    | -0.36*<br>(0.167)     | -0.37***<br>(0.0913)  | -0.038<br>(0.0417)     |
| Population density (per sq. km)       | -0.013**<br>(0.00420) | -0.0016<br>(0.00380)  | -0.0056<br>(0.0108) | -0.0055<br>(0.00590)  | -0.011**<br>(0.00358) | 0.0050***<br>(0.00120) |
| Unemployment (% labour force)         | -0.85***<br>(0.0977)  | -0.38***<br>(0.102)   | -1.71***<br>(0.251) | -0.66***<br>(0.101)   | -0.28***<br>(0.0644)  | 0.22***<br>(0.0322)    |
| GDP per capita (2010 US\$ constant)   | 1.81†<br>(1.062)      | 6.80***<br>(1.024)    | 20.1***<br>(3.126)  | 4.22***<br>(1.259)    | -0.29<br>(0.785)      | -1.15**<br>(0.414)     |
| Urban population (% total)            | -0.18***<br>(0.0385)  | -0.25***<br>(0.0413)  | -1.00***<br>(0.102) | -0.35***<br>(0.0532)  | -0.11***<br>(0.0336)  | 0.081***<br>(0.0145)   |
| Average temperature (tenths of °C)    | 0.030***<br>(0.00427) | 0.025***<br>(0.00398) | 0.19***<br>(0.0102) | 0.038***<br>(0.00468) | 0.0020<br>(0.00330)   | -0.016***<br>(0.00137) |
| Average household size                | -1.47<br>(1.086)      | -3.76*<br>(1.527)     | -13.1*<br>(5.297)   | -2.41<br>(1.515)      | 0.54<br>(0.748)       | 0.29<br>(0.459)        |
| Constant                              | 6.88<br>(10.38)       | -24.7*<br>(11.87)     | -85.1*<br>(39.27)   | -1.23<br>(12.87)      | 20.0**<br>(6.943)     | 4.95<br>(4.428)        |
| Observations                          | 64800                 | 64613                 | 58858               | 62958                 | 67073                 | 58284                  |
| Number of clusters                    | 796                   | 785                   | 738                 | 761                   | 798                   | 741                    |
| Prob. > $\chi^2$                      | 0.000                 | 0.000                 | 0.000               | 0.000                 | 0.000                 | 0.000                  |
| $R^2_{\text{between}}$                | 0.854                 | 0.587                 | 0.374               | 0.824                 | 0.790                 | 0.830                  |
| $R^2_{\text{within}}$                 | 0.523                 | 0.429                 | 0.192               | 0.218                 | 0.509                 | 0.555                  |
| $R^2_{\text{overall}}$                | 0.794                 | 0.545                 | 0.293               | 0.703                 | 0.750                 | 0.777                  |

Notes: Results corresponds to Figure 4 in the main text and Supplementary Figures S1 and S2. Random-effects GLS regression estimates. Standard errors (clustered at regional level) in parentheses. †  $p < .10$ ; \*  $p < .05$ ; \*\*  $p < .01$ ; \*\*\*  $p < .001$ . Reference categories are: *Before WHO declares COVID-19 as pandemic*, *Weekdays* and *No measures taken* for all government response indicators.

**Table S5 | Change of mobility patterns based on risk preference and share of population.**

|                                            | Retail & recreation   | Grocery & pharmacy   | Parks               | Transit stations     | Workplaces             | Residential            |
|--------------------------------------------|-----------------------|----------------------|---------------------|----------------------|------------------------|------------------------|
| Risk-taking                                | 7.11**<br>(2.399)     | -2.96<br>(2.149)     | 12.1**<br>(4.238)   | 2.67<br>(3.022)      | 2.10<br>(1.785)        | 1.82**<br>(0.612)      |
| % Population ages 65 and above             | -0.23<br>(0.148)      | -0.60***<br>(0.164)  | -0.56<br>(0.484)    | -0.36*<br>(0.153)    | -0.45***<br>(0.0965)   | -0.13**<br>(0.0489)    |
| Risk-taking*% Population ages 65 and above | -0.39*<br>(0.169)     | 0.23<br>(0.159)      | -0.40<br>(0.371)    | -0.12<br>(0.199)     | -0.16<br>(0.115)       | -0.18***<br>(0.0498)   |
| Weekends                                   | -4.39***<br>(0.132)   | -3.97***<br>(0.167)  | -4.54***<br>(0.446) | -0.79***<br>(0.189)  | 8.28***<br>(0.215)     | -3.28***<br>(0.110)    |
| Pandemic declaration                       | -11.8***<br>(0.879)   | -1.42*<br>(0.711)    | -8.39***<br>(1.374) | -12.6***<br>(0.828)  | -8.38***<br>(0.649)    | 3.62***<br>(0.286)     |
| Days after first death                     | 0.042†<br>(0.0216)    | 0.13**<br>(0.0172)   | 0.056<br>(0.0351)   | -0.12***<br>(0.0242) | 0.046*<br>(0.0190)     | 0.017*<br>(0.00831)    |
| ln(# confirmed cases+1)                    | -2.31***<br>(0.466)   | -1.87***<br>(0.395)  | 1.70†<br>(0.880)    | 1.72***<br>(0.481)   | -1.52***<br>(0.358)    | 0.14<br>(0.165)        |
| School                                     |                       |                      |                     |                      |                        |                        |
| <i>Recommend closing</i>                   | -7.61***<br>(2.103)   | 0.97<br>(1.087)      | -30.9***<br>(4.998) | 2.17<br>(1.614)      | 3.96***<br>(1.037)     | 2.50***<br>(0.582)     |
| <i>Require closing (some)</i>              | 6.67***<br>(1.834)    | 1.08<br>(1.672)      | 15.6***<br>(3.185)  | 5.18†<br>(2.729)     | 0.10<br>(1.243)        | -1.44***<br>(0.284)    |
| <i>Require closing</i>                     | -6.65***<br>(0.763)   | -5.53***<br>(0.599)  | -4.26***<br>(1.151) | -2.75***<br>(0.736)  | -5.92***<br>(0.598)    | 2.50***<br>(0.234)     |
| Workplace closing                          |                       |                      |                     |                      |                        |                        |
| <i>Recommend closing</i>                   | -1.70†<br>(0.906)     | 5.48***<br>(0.903)   | 8.01***<br>(1.346)  | -3.09***<br>(0.930)  | 0.89<br>(0.845)        | -0.44<br>(0.302)       |
| <i>Require closing (some)</i>              | -23.4***<br>(1.226)   | -7.34***<br>(1.099)  | -3.28†<br>(1.828)   | -16.0***<br>(1.293)  | -11.9***<br>(0.883)    | 4.04***<br>(0.371)     |
| <i>Require closing</i>                     | -16.8***<br>(1.334)   | -4.50***<br>(1.183)  | -5.76*<br>(2.417)   | -17.5***<br>(1.368)  | -9.78***<br>(0.956)    | 4.38***<br>(0.432)     |
| Public events                              |                       |                      |                     |                      |                        |                        |
| <i>Recommend cancelling</i>                | -0.71<br>(1.185)      | 2.58*<br>(1.023)     | -5.63***<br>(1.327) | -4.37**<br>(1.508)   | -2.35**<br>(0.797)     | 1.85***<br>(0.233)     |
| <i>Require cancelling</i>                  | -5.03***<br>(0.715)   | -0.43<br>(0.685)     | -3.89*<br>(1.652)   | -3.78***<br>(0.868)  | -4.05***<br>(0.674)    | 2.46***<br>(0.229)     |
| Restrictions on gatherings                 |                       |                      |                     |                      |                        |                        |
| <i>Above 1000 people</i>                   | 10.5***<br>(1.002)    | 8.95***<br>(1.090)   | 1.68<br>(2.010)     | 4.17***<br>(1.257)   | 6.67***<br>(0.883)     | -3.87***<br>(0.320)    |
| <i>101-1000 people</i>                     | 4.97***<br>(1.244)    | 8.11***<br>(1.078)   | 2.58<br>(2.040)     | 2.30†<br>(1.367)     | 5.58***<br>(0.861)     | -2.40***<br>(0.324)    |
| <i>11-100 people</i>                       | -1.30<br>(1.397)      | -1.05<br>(1.242)     | -5.13*<br>(2.457)   | -3.58*<br>(1.504)    | -4.65***<br>(1.083)    | 0.0039<br>(0.430)      |
| <i>10 people or less</i>                   | -1.69<br>(1.191)      | -0.58<br>(1.062)     | -3.63†<br>(1.876)   | -3.53**<br>(1.257)   | -2.67**<br>(0.915)     | -0.21<br>(0.356)       |
| Public transport                           |                       |                      |                     |                      |                        |                        |
| <i>Recommend closing</i>                   | -8.52***<br>(0.795)   | -9.87***<br>(0.701)  | -10.4***<br>(1.560) | -8.77***<br>(0.770)  | -10.8***<br>(0.613)    | 4.31***<br>(0.253)     |
| <i>Require closing</i>                     | -7.42***<br>(1.369)   | -11.6***<br>(1.316)  | -18.3***<br>(2.192) | -6.73***<br>(1.299)  | -5.22***<br>(1.004)    | 2.85***<br>(0.472)     |
| Stay at home requirements                  |                       |                      |                     |                      |                        |                        |
| <i>Recommend not leaving house</i>         | 3.40**<br>(1.173)     | 0.94<br>(0.815)      | 3.90*<br>(1.567)    | 1.89†<br>(1.072)     | 3.57***<br>(0.723)     | -0.94**<br>(0.314)     |
| <i>Require not leaving (loose)</i>         | -6.00***<br>(1.315)   | -6.71***<br>(1.123)  | -5.36*<br>(2.228)   | -4.59***<br>(1.201)  | -5.05***<br>(0.883)    | 2.98***<br>(0.372)     |
| <i>Require not leaving (strict)</i>        | -19.5***<br>(1.756)   | -25.7***<br>(1.527)  | -18.2***<br>(3.058) | -15.0***<br>(1.808)  | -13.0***<br>(1.349)    | 9.68***<br>(0.569)     |
| Internal movement                          |                       |                      |                     |                      |                        |                        |
| <i>Recommend movement restriction</i>      | -9.09***<br>(0.839)   | -6.84***<br>(0.663)  | -7.12***<br>(1.711) | -10.4***<br>(0.828)  | -3.72***<br>(0.530)    | 1.96***<br>(0.259)     |
| <i>Restrict movement</i>                   | -7.77***<br>(1.180)   | -6.57***<br>(0.835)  | -2.00<br>(2.679)    | -8.96***<br>(1.086)  | -6.42***<br>(0.701)    | 1.96***<br>(0.354)     |
| Population density (per sq. km)            | -0.012**<br>(0.00406) | -0.0021<br>(0.00362) | -0.0035<br>(0.0107) | -0.0047<br>(0.00555) | -0.0098**<br>(0.00342) | 0.0055***<br>(0.00117) |
| Unemployment (% labour)                    | -0.89***<br>(0.0954)  | -0.35**<br>(0.106)   | -1.75***<br>(0.247) | -0.67***<br>(0.102)  | -0.29***<br>(0.0663)   | 0.19***<br>(0.0328)    |



|                                     |                       |                       |                     |                       |                      |                        |
|-------------------------------------|-----------------------|-----------------------|---------------------|-----------------------|----------------------|------------------------|
| force)                              |                       |                       |                     |                       |                      |                        |
| GDP per capita (2010 US\$ constant) | 2.47*<br>(1.092)      | 6.31***<br>(1.027)    | 20.4***<br>(3.114)  | 4.20***<br>(1.204)    | -0.25<br>(0.780)     | -0.81*<br>(0.413)      |
| Urban population (% total)          | -0.18***<br>(0.0382)  | -0.25***<br>(0.0409)  | -0.99***<br>(0.102) | -0.34***<br>(0.0524)  | -0.10**<br>(0.0335)  | 0.077***<br>(0.0142)   |
| Average temperature (tenths of °C)  | 0.030***<br>(0.00434) | 0.025***<br>(0.00399) | 0.19***<br>(0.0103) | 0.037***<br>(0.00474) | -0.0020<br>(0.00336) | -0.015***<br>(0.00139) |
| Average household size              | -1.69<br>(1.158)      | -3.34*<br>(1.525)     | -13.2*<br>(5.422)   | -2.32<br>(1.559)      | 0.57<br>(0.785)      | 0.024<br>(0.423)       |
| Constant                            | 4.96<br>(10.47)       | -21.7†<br>(11.44)     | -84.0*<br>(38.82)   | -0.26<br>(12.52)      | 18.1**<br>(6.918)    | 4.59<br>(4.184)        |
| Observations                        | 64800                 | 64613                 | 58858               | 62958                 | 67073                | 58284                  |
| Number of clusters                  | 796                   | 785                   | 738                 | 761                   | 798                  | 741                    |
| Prob. > $\chi^2$                    | 0.000                 | 0.000                 | 0.000               | 0.000                 | 0.000                | 0.000                  |
| $R^2_{\text{between}}$              | 0.849                 | 0.578                 | 0.367               | 0.821                 | 0.782                | 0.823                  |
| $R^2_{\text{within}}$               | 0.522                 | 0.428                 | 0.196               | 0.217                 | 0.512                | 0.566                  |
| $R^2_{\text{overall}}$              | 0.790                 | 0.539                 | 0.292               | 0.700                 | 0.743                | 0.773                  |

Notes: Results corresponds to Figure 5 in the main text. Random-effects GLS regression estimates. Standard errors (clustered at regional level) in parentheses. †  $p < .10$ ; \*  $p < .05$ ; \*\*  $p < .01$ ; \*\*\*  $p < .001$ . Reference categories are: *Before WHO declares COVID-19 as pandemic*, *Weekdays* and *No measures taken* for all government response indicators.

**Table S6 | Country data availability for mobility (Google), risk preferences (GPS), and government response (OxCGRT)**

| Country                      | Google | GPS | OxCGRT | Country          | Google | GPS | OxCGRT |
|------------------------------|--------|-----|--------|------------------|--------|-----|--------|
| Afghanistan                  | Yes    | Yes | Yes    | Lebanon          | Yes    | No  | Yes    |
| Algeria                      | No     | Yes | Yes    | Lesotho          | No     | No  | Yes    |
| Andorra                      | No     | No  | Yes    | Libya            | Yes    | No  | Yes    |
| Angola                       | Yes    | No  | Yes    | Liechtenstein    | Yes    | No  | No     |
| Antigua and Barbuda          | Yes    | No  | No     | Lithuania        | Yes    | Yes | No     |
| Argentina                    | Yes    | Yes | Yes    | Luxembourg       | Yes    | No  | Yes    |
| Aruba                        | Yes    | No  | Yes    | Madagascar       | No     | No  | Yes    |
| Australia                    | Yes    | Yes | Yes    | Malawi           | No     | Yes | Yes    |
| Austria                      | Yes    | Yes | Yes    | Malaysia         | Yes    | No  | Yes    |
| Azerbaijan                   | No     | No  | Yes    | Mali             | Yes    | No  | Yes    |
| Bahrain                      | Yes    | No  | Yes    | Malta            | Yes    | No  | No     |
| Bangladesh                   | Yes    | Yes | Yes    | Mauritania       | No     | No  | Yes    |
| Barbados                     | Yes    | No  | Yes    | Mauritius        | Yes    | No  | Yes    |
| Belarus                      | Yes    | No  | No     | Mexico           | Yes    | Yes | Yes    |
| Belgium                      | Yes    | No  | Yes    | Moldova          | Yes    | Yes | Yes    |
| Belize                       | Yes    | No  | Yes    | Mongolia         | Yes    | No  | Yes    |
| Benin                        | Yes    | No  | No     | Morocco          | No     | Yes | No     |
| Bermuda                      | No     | No  | Yes    | Mozambique       | Yes    | No  | Yes    |
| Bolivia                      | Yes    | Yes | Yes    | Myanmar (Burma)  | Yes    | No  | Yes    |
| Bosnia and Herzegovina       | Yes    | Yes | Yes    | Namibia          | Yes    | No  | Yes    |
| Botswana                     | Yes    | Yes | Yes    | Nepal            | Yes    | No  | No     |
| Brazil                       | Yes    | Yes | Yes    | Netherlands      | Yes    | Yes | Yes    |
| Brunei                       | No     | No  | Yes    | New Zealand      | Yes    | No  | Yes    |
| Bulgaria                     | Yes    | No  | Yes    | Nicaragua        | Yes    | Yes | Yes    |
| Burkina Faso                 | Yes    | No  | Yes    | Niger            | Yes    | No  | Yes    |
| Burundi                      | No     | No  | Yes    | Nigeria          | Yes    | Yes | Yes    |
| Cambodia                     | Yes    | Yes | No     | North Macedonia  | Yes    | No  | No     |
| Cameroon                     | Yes    | Yes | Yes    | Norway           | Yes    | No  | Yes    |
| Canada                       | Yes    | Yes | Yes    | Oman             | Yes    | No  | Yes    |
| Cape Verde                   | Yes    | No  | Yes    | Pakistan         | Yes    | Yes | Yes    |
| Chad                         | No     | No  | Yes    | Palestine        | No     | No  | Yes    |
| Chile                        | Yes    | Yes | Yes    | Panama           | Yes    | No  | Yes    |
| China                        | No     | Yes | Yes    | Papua New Guinea | Yes    | No  | Yes    |
| Colombia                     | Yes    | Yes | Yes    | Paraguay         | Yes    | No  | Yes    |
| Costa Rica                   | Yes    | Yes | Yes    | Peru             | Yes    | Yes | Yes    |
| Croatia                      | Yes    | Yes | Yes    | Philippines      | Yes    | Yes | Yes    |
| Cuba                         | No     | No  | Yes    | Poland           | Yes    | Yes | Yes    |
| Cyprus                       | No     | No  | Yes    | Portugal         | Yes    | Yes | Yes    |
| Czechia                      | Yes    | Yes | Yes    | Puerto Rico      | Yes    | No  | Yes    |
| Côte d'Ivoire                | Yes    | No  | No     | Qatar            | Yes    | No  | Yes    |
| Democratic Republic of Congo | No     | No  | Yes    | Romania          | Yes    | Yes | Yes    |
| Denmark                      | Yes    | No  | Yes    | Russia           | No     | Yes | No     |

|                    |     |     |     |                      |     |     |     |
|--------------------|-----|-----|-----|----------------------|-----|-----|-----|
| Djibouti           | No  | No  | Yes | Rwanda               | Yes | Yes | Yes |
| Dominican Republic | Yes | No  | Yes | Réunion              | Yes | No  | No  |
| Ecuador            | Yes | No  | Yes | San Marino           | No  | No  | Yes |
| Egypt              | Yes | Yes | Yes | Saudi Arabia         | Yes | Yes | Yes |
| El Salvador        | Yes | No  | Yes | Senegal              | Yes | No  | No  |
| Estonia            | Yes | Yes | Yes | Serbia               | No  | Yes | No  |
| Eswatini           | No  | No  | Yes | Seychelles           | No  | No  | Yes |
| Fiji               | Yes | No  | No  | Sierra Leone         | No  | No  | Yes |
| Finland            | Yes | Yes | Yes | Singapore            | Yes | No  | Yes |
| France             | Yes | Yes | Yes | Slovakia             | Yes | No  | Yes |
| Gabon              | Yes | No  | Yes | Slovenia             | Yes | No  | Yes |
| Gambia             | No  | No  | Yes | South Africa         | Yes | Yes | Yes |
| Georgia            | Yes | Yes | No  | South Korea          | Yes | Yes | Yes |
| Germany            | Yes | Yes | Yes | South Sudan          | No  | No  | Yes |
| Ghana              | Yes | Yes | Yes | Spain                | Yes | Yes | Yes |
| Greece             | Yes | Yes | Yes | Sri Lanka            | Yes | Yes | Yes |
| Greenland          | No  | No  | Yes | Sudan                | No  | No  | Yes |
| Guam               | No  | No  | Yes | Suriname             | No  | Yes | No  |
| Guatemala          | Yes | Yes | Yes | Sweden               | Yes | Yes | Yes |
| Guinea-Bissau      | Yes | No  | No  | Switzerland          | Yes | Yes | Yes |
| Guyana             | No  | No  | Yes | Syria                | No  | No  | Yes |
| Haiti              | Yes | Yes | No  | Taiwan               | Yes | No  | Yes |
| Honduras           | Yes | No  | Yes | Tajikistan           | Yes | No  | No  |
| Hong Kong          | Yes | No  | Yes | Tanzania             | Yes | Yes | Yes |
| Hungary            | Yes | Yes | Yes | Thailand             | Yes | Yes | Yes |
| India              | Yes | Yes | Yes | The Bahamas          | Yes | No  | No  |
| Indonesia          | Yes | Yes | Yes | Togo                 | Yes | No  | No  |
| Iran               | No  | Yes | Yes | Trinidad and Tobago  | Yes | No  | Yes |
| Iraq               | Yes | Yes | Yes | Tunisia              | No  | No  | Yes |
| Ireland            | Yes | No  | Yes | Turkey               | Yes | Yes | Yes |
| Israel             | Yes | Yes | Yes | Uganda               | Yes | Yes | Yes |
| Italy              | Yes | Yes | Yes | Ukraine              | No  | Yes | No  |
| Jamaica            | Yes | No  | Yes | United Arab Emirates | Yes | Yes | Yes |
| Japan              | Yes | Yes | Yes | United Kingdom       | Yes | Yes | Yes |
| Jordan             | Yes | Yes | Yes | United States        | Yes | Yes | Yes |
| Kazakhstan         | Yes | Yes | Yes | Uruguay              | Yes | No  | Yes |
| Kenya              | Yes | Yes | Yes | Uzbekistan           | No  | No  | Yes |
| Kosovo             | No  | No  | Yes | Venezuela            | Yes | Yes | Yes |
| Kuwait             | Yes | No  | Yes | Vietnam              | Yes | Yes | Yes |
| Kyrgyzstan         | Yes | No  | Yes | Yemen                | Yes | No  | No  |
| Laos               | Yes | No  | Yes | Zambia               | Yes | No  | Yes |
| Latvia             | Yes | No  | No  | Zimbabwe             | Yes | Yes | Yes |

Note: GPS = Global Preference Survey. OxCGRT = Oxford COVID-19 Government Response Tracker. Numbers in bracket show the number of regions in the corresponding dataset.

**Table S7 | Robustness checks on overall risk-mobility relationship.**

| <b>Robust 1</b>         | Retail & recreation             | Grocery & pharmacy              | Parks                           | Transit stations                | Workplaces                      | Residential                     |
|-------------------------|---------------------------------|---------------------------------|---------------------------------|---------------------------------|---------------------------------|---------------------------------|
| Risk-taking             | 2.22 <sup>†</sup><br>(1.183)    | -0.33<br>(1.006)                | 8.02 <sup>**</sup><br>(2.535)   | 1.31<br>(1.352)                 | 0.76<br>(0.854)                 | 0.089<br>(0.413)                |
| Pandemic declaration    | -12.9 <sup>***</sup><br>(0.911) | -2.48 <sup>***</sup><br>(0.744) | -10.1 <sup>***</sup><br>(1.379) | -13.0 <sup>***</sup><br>(0.822) | -8.93 <sup>***</sup><br>(0.645) | 4.36 <sup>***</sup><br>(0.323)  |
| Weekends                | -4.88 <sup>***</sup><br>(0.127) | -4.23 <sup>***</sup><br>(0.170) | -4.95 <sup>***</sup><br>(0.478) | -0.70 <sup>***</sup><br>(0.198) | 8.33 <sup>***</sup><br>(0.218)  | -3.39 <sup>***</sup><br>(0.129) |
| % Population 65+        | -0.18<br>(0.147)                | -0.94 <sup>***</sup><br>(0.128) | -1.50 <sup>***</sup><br>(0.295) | -0.30 <sup>†</sup><br>(0.156)   | -0.17 <sup>†</sup><br>(0.0922)  | 0.20 <sup>***</sup><br>(0.0489) |
| Controls                | Yes                             | Yes                             | Yes                             | Yes                             | Yes                             | Yes                             |
| Observations            | 58340                           | 57571                           | 51715                           | 57764                           | 63041                           | 44546                           |
| Number of clusters      | 688                             | 678                             | 609                             | 680                             | 744                             | 524                             |
| Prob. > $\chi^2$        | 0.000                           | 0.000                           | 0.000                           | 0.000                           | 0.000                           | 0.000                           |
| R <sup>2</sup> -between | 0.861                           | 0.600                           | 0.403                           | 0.827                           | 0.788                           | 0.806                           |
| R <sup>2</sup> -within  | 0.415                           | 0.431                           | 0.339                           | 0.168                           | 0.513                           | 0.489                           |
| R <sup>2</sup> -overall | 0.798                           | 0.558                           | 0.371                           | 0.704                           | 0.750                           | 0.761                           |
| <b>Robust 2</b>         | Retail & recreation             | Grocery & pharmacy              | Parks                           | Transit stations                | Workplaces                      | Residential                     |
| Risk-taking             | 2.55 <sup>*</sup><br>(1.074)    | -0.28<br>(0.905)                | 9.46 <sup>***</sup><br>(2.589)  | 1.86<br>(1.186)                 | -0.25<br>(0.773)                | 0.25<br>(0.427)                 |
| Pandemic declaration    | -14.0 <sup>***</sup><br>(1.031) | -4.68 <sup>***</sup><br>(0.822) | -10.9 <sup>***</sup><br>(1.519) | -14.4 <sup>***</sup><br>(0.908) | -10.7 <sup>***</sup><br>(0.716) | 4.33 <sup>***</sup><br>(0.330)  |
| Weekends                | -4.73 <sup>***</sup><br>(0.146) | -3.84 <sup>***</sup><br>(0.208) | -4.41 <sup>***</sup><br>(0.549) | -1.42 <sup>***</sup><br>(0.235) | 7.54 <sup>***</sup><br>(0.271)  | -3.33 <sup>***</sup><br>(0.134) |
| % Population 65+        | -0.46 <sup>**</sup><br>(0.155)  | -0.93 <sup>***</sup><br>(0.128) | -1.83 <sup>***</sup><br>(0.319) | -0.25 <sup>†</sup><br>(0.143)   | -0.22 <sup>*</sup><br>(0.103)   | 0.22 <sup>***</sup><br>(0.0514) |
| Controls                | Yes                             | Yes                             | Yes                             | Yes                             | Yes                             | Yes                             |
| Observations            | 41146                           | 41146                           | 41146                           | 41146                           | 41146                           | 41146                           |
| Number of clusters      | 484                             | 484                             | 484                             | 484                             | 484                             | 484                             |
| Prob. > $\chi^2$        | 0.000                           | 0.000                           | 0.000                           | 0.000                           | 0.000                           | 0.000                           |
| R <sup>2</sup> -between | 0.849                           | 0.570                           | 0.391                           | 0.840                           | 0.771                           | 0.807                           |
| R <sup>2</sup> -within  | 0.583                           | 0.572                           | 0.372                           | 0.321                           | 0.638                           | 0.508                           |
| R <sup>2</sup> -overall | 0.803                           | 0.571                           | 0.377                           | 0.773                           | 0.752                           | 0.763                           |
| <b>Robust 3</b>         | Retail & recreation             | Grocery & pharmacy              | Parks                           | Transit stations                | Workplaces                      | Residential                     |
| Risk-taking             | 3.72 <sup>**</sup><br>(1.225)   | -0.25<br>(1.138)                | 6.07 <sup>*</sup><br>(2.455)    | 1.60<br>(1.597)                 | 0.58<br>(0.940)                 | -0.48<br>(0.374)                |
| Pandemic declaration    | -17.2 <sup>***</sup><br>(0.790) | -3.59 <sup>***</sup><br>(0.518) | -10.7 <sup>***</sup><br>(1.084) | -18.2 <sup>***</sup><br>(0.825) | -13.7 <sup>***</sup><br>(0.612) | 5.91 <sup>***</sup><br>(0.264)  |
| Weekends                | -4.44 <sup>***</sup><br>(0.140) | -4.08 <sup>***</sup><br>(0.172) | -4.60 <sup>***</sup><br>(0.459) | -0.87 <sup>***</sup><br>(0.191) | 8.31 <sup>***</sup><br>(0.209)  | -3.29 <sup>***</sup><br>(0.109) |
| % Population 65+        | 0.30 <sup>*</sup><br>(0.146)    | -0.56 <sup>***</sup><br>(0.160) | -0.0023<br>(0.396)              | 0.099<br>(0.192)                | -0.0078<br>(0.102)              | -0.16 <sup>**</sup><br>(0.0510) |
| Controls                | Yes                             | Yes                             | Yes                             | Yes                             | Yes                             | Yes                             |
| Observations            | 64800                           | 64613                           | 58858                           | 62958                           | 67073                           | 58284                           |
| Number of clusters      | 796                             | 785                             | 738                             | 761                             | 798                             | 741                             |
| Prob. > $\chi^2$        | 0.000                           | 0.000                           | 0.000                           | 0.000                           | 0.000                           | 0.000                           |
| R <sup>2</sup> -between | 0.846                           | 0.568                           | 0.386                           | 0.808                           | 0.768                           | 0.802                           |
| R <sup>2</sup> -within  | 0.632                           | 0.471                           | 0.284                           | 0.272                           | 0.528                           | 0.626                           |
| R <sup>2</sup> -overall | 0.809                           | 0.537                           | 0.344                           | 0.697                           | 0.730                           | 0.764                           |

Notes: **Robust 1** = regions with at least one censored values on the outcome mobility measures excluded. **Robust 2** = regions with at least one censored values on any mobility measures excluded. **Robust 3** = government response indicators recoded as no measures taken if policy is not applied countrywide. Random-effects GLS regression estimates. Standard errors (clustered at regional level) in parentheses. <sup>†</sup>  $p < .10$ ; \*  $p < .05$ ; \*\*  $p < .01$ ; \*\*\*  $p < .001$ . We controlled for number of confirmed cases (in logs), population density, and the set of government response indicators in each regression. Reference categories are: *Before WHO declares COVID-19 as pandemic*, *Weekdays* and *No measures taken*.

**Table S8 | Robustness checks on moderation effect of pandemic declaration on risk-mobility relationship.**

| <b>Robust 1</b>                  | Retail & recreation | Grocery & pharmacy  | Parks               | Transit stations    | Workplaces          | Residential         |
|----------------------------------|---------------------|---------------------|---------------------|---------------------|---------------------|---------------------|
| Risk-taking                      | -1.13<br>(1.016)    | -4.54***<br>(0.806) | 0.91<br>(1.885)     | -3.33*<br>(1.340)   | -1.78*<br>(0.794)   | 0.24<br>(0.223)     |
| Pandemic declaration             | -12.5***<br>(0.920) | -1.92**<br>(0.742)  | -9.06***<br>(1.396) | -12.4***<br>(0.833) | -8.65***<br>(0.641) | 4.33***<br>(0.324)  |
| Pandemic declaration*Risk-taking | 4.96***<br>(1.210)  | 6.26***<br>(1.075)  | 10.5***<br>(2.477)  | 6.92***<br>(1.514)  | 3.77***<br>(0.880)  | -0.22<br>(0.515)    |
| Controls                         | Yes                 | Yes                 | Yes                 | Yes                 | Yes                 | Yes                 |
| Observations                     | 58340               | 57571               | 51715               | 57764               | 63041               | 44546               |
| Number of clusters               | 688                 | 678                 | 609                 | 680                 | 744                 | 524                 |
| Prob. > $\chi^2$                 | 0.000               | 0.000               | 0.000               | 0.000               | 0.000               | 0.000               |
| R <sup>2</sup> -between          | 0.862               | 0.603               | 0.407               | 0.828               | 0.789               | 0.806               |
| R <sup>2</sup> -within           | 0.418               | 0.432               | 0.337               | 0.170               | 0.512               | 0.489               |
| R <sup>2</sup> -overall          | 0.799               | 0.560               | 0.372               | 0.705               | 0.751               | 0.761               |
| <b>Robust 2</b>                  | Retail & recreation | Grocery & pharmacy  | Parks               | Transit stations    | Workplaces          | Residential         |
| Risk-taking                      | -0.65<br>(0.787)    | -3.10***<br>(0.627) | 1.54<br>(2.131)     | -1.45<br>(1.055)    | -1.27*<br>(0.638)   | 0.31<br>(0.228)     |
| Pandemic declaration             | -13.4***<br>(1.053) | -4.16***<br>(0.835) | -9.42***<br>(1.564) | -13.8***<br>(0.937) | -10.5***<br>(0.729) | 4.32***<br>(0.331)  |
| Pandemic declaration*Risk-taking | 4.70***<br>(1.388)  | 4.15***<br>(1.190)  | 11.7***<br>(2.695)  | 4.88**<br>(1.698)   | 1.50<br>(0.995)     | -0.092<br>(0.548)   |
| Controls                         | Yes                 | Yes                 | Yes                 | Yes                 | Yes                 | Yes                 |
| Observations                     | 41146               | 41146               | 41146               | 41146               | 41146               | 41146               |
| Number of clusters               | 484                 | 484                 | 484                 | 484                 | 484                 | 484                 |
| Prob. > $\chi^2$                 | 0.000               | 0.000               | 0.000               | 0.000               | 0.000               | 0.000               |
| R <sup>2</sup> -between          | 0.850               | 0.572               | 0.395               | 0.841               | 0.771               | 0.807               |
| R <sup>2</sup> -within           | 0.587               | 0.574               | 0.371               | 0.326               | 0.639               | 0.508               |
| R <sup>2</sup> -overall          | 0.804               | 0.572               | 0.379               | 0.774               | 0.753               | 0.763               |
| <b>Robust 3</b>                  | Retail & recreation | Grocery & pharmacy  | Parks               | Transit stations    | Workplaces          | Residential         |
| Risk-taking                      | 1.78<br>(1.096)     | -2.17*<br>(0.945)   | 1.30<br>(2.028)     | -0.38<br>(1.517)    | 0.39<br>(0.823)     | -1.17***<br>(0.263) |
| Pandemic declaration             | -17.2***<br>(0.795) | -3.51***<br>(0.527) | -10.4***<br>(1.087) | -18.1***<br>(0.831) | -13.7***<br>(0.615) | 5.95***<br>(0.261)  |
| Pandemic declaration*Risk-taking | 2.98**<br>(1.083)   | 2.93**<br>(1.025)   | 7.07**<br>(2.382)   | 2.93*<br>(1.322)    | 0.28<br>(0.923)     | 1.07*<br>(0.443)    |
| Controls                         | Yes                 | Yes                 | Yes                 | Yes                 | Yes                 | Yes                 |
| Observations                     | 64800               | 64613               | 58858               | 62958               | 67073               | 58284               |
| Number of clusters               | 796                 | 785                 | 738                 | 761                 | 798                 | 741                 |
| Prob. > $\chi^2$                 | 0.000               | 0.000               | 0.000               | 0.000               | 0.000               | 0.000               |
| R <sup>2</sup> -between          | 0.846               | 0.569               | 0.388               | 0.809               | 0.768               | 0.803               |
| R <sup>2</sup> -within           | 0.631               | 0.470               | 0.282               | 0.271               | 0.528               | 0.629               |
| R <sup>2</sup> -overall          | 0.809               | 0.537               | 0.344               | 0.697               | 0.730               | 0.765               |

Notes: **Robust 1** = regions with at least one censored values on the outcome mobility measures excluded. **Robust 2** = regions with at least one censored values on any mobility measures excluded. **Robust 3** = government response indicators recoded as no measures taken if policy is not applied countrywide. Random-effects GLS regression estimates. Standard errors (clustered at regional level) in parentheses. †  $p < .10$ ; \*  $p < .05$ ; \*\*  $p < .01$ ; \*\*\*  $p < .001$ . We controlled for weekend dummy, share of population over 65, day since first confirmed death, number of confirmed cases (in logs), population density, and the set of government response indicators in each regression. Reference categories are: *Before WHO declares COVID-19 as pandemic*, *Weekdays* and *No measures taken*.

**Table S9 | Robustness checks on weekends-weekdays mobility change with mediation from risk attitude.**

| <b>Robust 1</b>         | Retail & recreation | Grocery & pharmacy  | Parks               | Transit stations    | Workplaces         | Residential         |
|-------------------------|---------------------|---------------------|---------------------|---------------------|--------------------|---------------------|
| Risk-taking             | 1.78<br>(1.190)     | -0.51<br>(0.995)    | 7.10**<br>(2.484)   | 0.97<br>(1.360)     | 0.40<br>(0.873)    | 0.39<br>(0.445)     |
| Weekends                | -4.76***<br>(0.125) | -4.18***<br>(0.166) | -4.69***<br>(0.487) | -0.63**<br>(0.193)  | 8.40***<br>(0.216) | -3.49***<br>(0.128) |
| Weekends*Risk-taking    | 1.62***<br>(0.308)  | 0.70†<br>(0.406)    | 3.44**<br>(1.092)   | 1.25*<br>(0.541)    | 1.32*<br>(0.511)   | -1.14***<br>(0.305) |
| Controls                | Yes                 | Yes                 | Yes                 | Yes                 | Yes                | Yes                 |
| Observations            | 58340               | 57571               | 51715               | 57764               | 63041              | 44546               |
| Number of clusters      | 688                 | 678                 | 609                 | 680                 | 744                | 524                 |
| Prob. > $\chi^2$        | 0.000               | 0.000               | 0.000               | 0.000               | 0.000              | 0.000               |
| R <sup>2</sup> -between | 0.861               | 0.600               | 0.403               | 0.827               | 0.788              | 0.807               |
| R <sup>2</sup> -within  | 0.416               | 0.431               | 0.339               | 0.168               | 0.513              | 0.489               |
| R <sup>2</sup> -overall | 0.799               | 0.558               | 0.371               | 0.704               | 0.750              | 0.761               |
| <b>Robust 2</b>         | Retail & recreation | Grocery & pharmacy  | Parks               | Transit stations    | Workplaces         | Residential         |
| Risk-taking             | 2.02†<br>(1.082)    | -0.49<br>(0.894)    | 8.30**<br>(2.541)   | 1.35<br>(1.210)     | -0.78<br>(0.815)   | 0.58<br>(0.463)     |
| Weekends                | -4.55***<br>(0.140) | -3.77***<br>(0.208) | -4.01***<br>(0.563) | -1.25***<br>(0.236) | 7.73***<br>(0.276) | -3.44***<br>(0.133) |
| Weekends*Risk-taking    | 2.04***<br>(0.349)  | 0.80†<br>(0.454)    | 4.47***<br>(1.306)  | 1.96***<br>(0.585)  | 2.06**<br>(0.635)  | -1.25***<br>(0.321) |
| Controls                | Yes                 | Yes                 | Yes                 | Yes                 | Yes                | Yes                 |
| Observations            | 41146               | 41146               | 41146               | 41146               | 41146              | 41146               |
| Number of clusters      | 484                 | 484                 | 484                 | 484                 | 484                | 484                 |
| Prob. > $\chi^2$        | 0.000               | 0.000               | 0.000               | 0.000               | 0.000              | 0.000               |
| R <sup>2</sup> -between | 0.849               | 0.571               | 0.391               | 0.840               | 0.771              | 0.807               |
| R <sup>2</sup> -within  | 0.583               | 0.572               | 0.373               | 0.322               | 0.638              | 0.508               |
| R <sup>2</sup> -overall | 0.803               | 0.571               | 0.378               | 0.773               | 0.753              | 0.764               |
| <b>Robust 3</b>         | Retail & recreation | Grocery & pharmacy  | Parks               | Transit stations    | Workplaces         | Residential         |
| Risk-taking             | 3.33**<br>(1.241)   | -0.37<br>(1.148)    | 5.48*<br>(2.439)    | 1.36<br>(1.604)     | 0.28<br>(0.965)    | -0.31<br>(0.386)    |
| Weekends                | -4.36***<br>(0.139) | -4.05***<br>(0.170) | -4.47***<br>(0.464) | -0.82***<br>(0.186) | 8.36***<br>(0.206) | -3.34***<br>(0.108) |
| Weekends*Risk-taking    | 1.46***<br>(0.331)  | 0.47<br>(0.420)     | 2.00†<br>(1.026)    | 0.91†<br>(0.494)    | 1.12*<br>(0.494)   | -0.72**<br>(0.259)  |
| Controls                | Yes                 | Yes                 | Yes                 | Yes                 | Yes                | Yes                 |
| Observations            | 64800               | 64613               | 58858               | 62958               | 67073              | 58284               |
| Number of clusters      | 796                 | 785                 | 738                 | 761                 | 798                | 741                 |
| Prob. > $\chi^2$        | 0.000               | 0.000               | 0.000               | 0.000               | 0.000              | 0.000               |
| R <sup>2</sup> -between | 0.846               | 0.568               | 0.386               | 0.808               | 0.768              | 0.802               |
| R <sup>2</sup> -within  | 0.633               | 0.471               | 0.284               | 0.272               | 0.528              | 0.626               |
| R <sup>2</sup> -overall | 0.809               | 0.537               | 0.344               | 0.697               | 0.730              | 0.765               |

Notes: **Robust 1** = regions with at least one censored values on the outcome mobility measures excluded. **Robust 2** = regions with at least one censored values on any mobility measures excluded. **Robust 3** = government response indicators recoded as no measures taken if policy is not applied countrywide. Random-effects GLS regression estimates. Standard errors (clustered at regional level) in parentheses. †  $p < .10$ ; \*  $p < .05$ ; \*\*  $p < .01$ ; \*\*\*  $p < .001$ . We controlled for pandemic declaration dummy, day since first confirmed death, share of population over 65, number of confirmed cases (in logs), population density, and the set of government response indicators in each regression. Reference categories are: *Before WHO declares COVID-19 as pandemic*, *Weekdays* and *No measures taken*.



|                    |       |       |       |       |       |       |
|--------------------|-------|-------|-------|-------|-------|-------|
| Observations       | 64800 | 64613 | 58858 | 62958 | 67073 | 58284 |
| Number of clusters | 796   | 785   | 738   | 761   | 798   | 741   |
| Prob. > $\chi^2$   | 0.000 | 0.000 | 0.000 | 0.000 | 0.000 | 0.000 |
| $R^2$ -between     | 0.850 | 0.576 | 0.389 | 0.810 | 0.775 | 0.809 |
| $R^2$ -within      | 0.633 | 0.470 | 0.283 | 0.272 | 0.529 | 0.631 |
| $R^2$ -overall     | 0.813 | 0.542 | 0.345 | 0.698 | 0.736 | 0.770 |

Notes: **Robust 1** = regions with at least one censored values on the outcome mobility measures excluded. **Robust 2** = regions with at least one censored values on any mobility measures excluded. **Robust 3** = government response indicators recoded as no measures taken if policy is not applied countrywide. Random-effects GLS regression estimates. Standard errors (clustered at regional level) in parentheses. †  $p < .10$ ; \*  $p < .05$ ; \*\*  $p < .01$ ; \*\*\*  $p < .001$ . We controlled for the day since first confirmed death, share of population over 65, number of confirmed cases (in logs), population density, and the set of government response indicators in each regression. Reference categories are: *Before WHO declares COVID-19 as pandemic*, *Weekdays* and *No measures taken*.



**Table S11 | Robustness checks on risk preference and share of population at risk interaction effect on mobility.**

| <b>Robust 1</b>         | Retail & recreation | Grocery & pharmacy | Parks    | Transit stations | Workplaces | Residential |
|-------------------------|---------------------|--------------------|----------|------------------|------------|-------------|
| Risk-taking             | 6.46*               | -1.77              | 17.2***  | 3.19             | 1.74       | 1.84**      |
|                         | (2.593)             | (2.191)            | (4.404)  | (3.354)          | (1.891)    | (0.712)     |
| % Population 65+        | -0.40*              | -0.86***           | -1.97*** | -0.39*           | -0.22*     | 0.100†      |
|                         | (0.176)             | (0.164)            | (0.371)  | (0.156)          | (0.0999)   | (0.0547)    |
| Risk-taking*            | -0.37*              | 0.13               | -0.83*   | -0.17            | -0.090     | -0.17**     |
| % Population 65+        | (0.185)             | (0.167)            | (0.363)  | (0.233)          | (0.123)    | (0.0597)    |
| Controls                | Yes                 | Yes                | Yes      | Yes              | Yes        | Yes         |
| Observations            | 58340               | 57571              | 51715    | 57764            | 63041      | 44546       |
| Number of clusters      | 688                 | 678                | 609      | 680              | 744        | 524         |
| Prob. > $\chi^2$        | 0.000               | 0.000              | 0.000    | 0.000            | 0.000      | 0.000       |
| R <sup>2</sup> -between | 0.861               | 0.600              | 0.403    | 0.827            | 0.788      | 0.806       |
| R <sup>2</sup> -within  | 0.417               | 0.431              | 0.348    | 0.169            | 0.513      | 0.496       |
| R <sup>2</sup> -overall | 0.799               | 0.558              | 0.374    | 0.704            | 0.750      | 0.762       |
| <b>Robust 2</b>         | Retail & recreation | Grocery & pharmacy | Parks    | Transit stations | Workplaces | Residential |
| Risk-taking             | 8.32***             | -1.82              | 14.9**   | 4.50*            | -0.95      | 2.24**      |
|                         | (1.922)             | (1.737)            | (4.687)  | (2.041)          | (1.279)    | (0.745)     |
| % Population 65+        | -0.78***            | -0.85***           | -2.13*** | -0.40*           | -0.18      | 0.10†       |
|                         | (0.200)             | (0.174)            | (0.416)  | (0.185)          | (0.123)    | (0.0570)    |
| Risk-taking*            | -0.55**             | 0.15               | -0.52    | -0.25            | 0.067      | -0.19**     |
| % Population 65+        | (0.176)             | (0.149)            | (0.416)  | (0.177)          | (0.106)    | (0.0630)    |
| Controls                | Yes                 | Yes                | Yes      | Yes              | Yes        | Yes         |
| Observations            | 41146               | 41146              | 41146    | 41146            | 41146      | 41146       |
| Number of clusters      | 484                 | 484                | 484      | 484              | 484        | 484         |
| Prob. > $\chi^2$        | 0.000               | 0.000              | 0.000    | 0.000            | 0.000      | 0.000       |
| R <sup>2</sup> -between | 0.849               | 0.571              | 0.391    | 0.840            | 0.771      | 0.807       |
| R <sup>2</sup> -within  | 0.589               | 0.572              | 0.376    | 0.325            | 0.639      | 0.518       |
| R <sup>2</sup> -overall | 0.804               | 0.571              | 0.378    | 0.773            | 0.752      | 0.765       |
| <b>Robust 3</b>         | Retail & recreation | Grocery & pharmacy | Parks    | Transit stations | Workplaces | Residential |
| Risk-taking             | 4.23                | -5.50*             | 6.36     | -1.40            | -1.28      | 2.53***     |
|                         | (2.691)             | (2.358)            | (4.232)  | (3.551)          | (1.940)    | (0.661)     |
| % Population 65+        | 0.27†               | -0.31†             | -0.016   | 0.24             | 0.080      | -0.30***    |
|                         | (0.147)             | (0.175)            | (0.473)  | (0.175)          | (0.0992)   | (0.0528)    |
| Risk-taking*            | -0.046              | 0.48**             | -0.026   | 0.27             | 0.17       | -0.27***    |
| % Population 65+        | (0.163)             | (0.159)            | (0.345)  | (0.209)          | (0.114)    | (0.0446)    |
| Controls                | Yes                 | Yes                | Yes      | Yes              | Yes        | Yes         |
| Observations            | 64800               | 64613              | 58858    | 62958            | 67073      | 58284       |
| Number of clusters      | 796                 | 785                | 738      | 761              | 798        | 741         |
| Prob. > $\chi^2$        | 0.000               | 0.000              | 0.000    | 0.000            | 0.000      | 0.000       |
| R <sup>2</sup> -between | 0.846               | 0.568              | 0.386    | 0.808            | 0.768      | 0.802       |
| R <sup>2</sup> -within  | 0.633               | 0.471              | 0.284    | 0.271            | 0.527      | 0.640       |
| R <sup>2</sup> -overall | 0.809               | 0.539              | 0.344    | 0.697            | 0.730      | 0.768       |

Notes: **Robust 1** = regions with at least one censored values on the outcome mobility measures excluded. **Robust 2** = regions with at least one censored values on any mobility measures excluded. **Robust 3** = government response indicators recoded as no measures taken if policy is not applied countrywide. Random-effects GLS regression estimates. Standard errors (clustered at regional level) in parentheses. †  $p < .10$ ; \*  $p < .05$ ; \*\*  $p < .01$ ; \*\*\*  $p < .001$ . We controlled for weekend dummy, pandemic declaration dummy, days since first confirmed death, number of confirmed cases (in logs), population density, and the set of government response indicators in each regression. Reference categories are: *Before WHO declares COVID-19 as pandemic*, *Weekdays* and *No measures taken*.
